# Supplementary material
Source: PubMed Central journal article supplement (PMC4486492)

## Supplementary Information

### An efficient and mild oxidant for the synthesis of s-tetrazines

Ramajeyam Selvaraja<sup>a</sup>, Joseph M. Fox<sup>a\*</sup>

<sup>a</sup>*Department of Chemistry and Biochemistry, University of Delaware, Newark DE 19716*

E-mail: [jmfox@udel.edu](mailto:jmfox@udel.edu)

| <b>NMR Spectra</b>                           | <b>Page</b> |
|----------------------------------------------|-------------|
| <sup>1</sup> H NMR of Spectrum of <b>8</b>   | S-4         |
| <sup>13</sup> C NMR of Spectrum of <b>8</b>  | S-5         |
| <sup>1</sup> H NMR of Spectrum of <b>9e</b>  | S-6         |
| <sup>13</sup> C NMR of Spectrum of <b>9e</b> | S-7         |
| <sup>1</sup> H NMR of Spectrum of <b>9f</b>  | S-8         |
| <sup>13</sup> C NMR of Spectrum of <b>9f</b> | S-9         |
| <sup>1</sup> H NMR of Spectrum of <b>9g</b>  | S-10        |
| <sup>13</sup> C NMR of Spectrum of <b>9g</b> | S-11        |

|                                               |      |
|-----------------------------------------------|------|
| <sup>1</sup> H NMR of Spectrum of <b>9h</b>   | S-12 |
| <sup>13</sup> C NMR of Spectrum of <b>9h</b>  | S-13 |
| <sup>1</sup> H NMR of Spectrum of <b>10a</b>  | S-14 |
| <sup>13</sup> C NMR of Spectrum of <b>10a</b> | S-15 |
| <sup>1</sup> H NMR of Spectrum of <b>10b</b>  | S-16 |
| <sup>13</sup> C NMR of Spectrum of <b>10b</b> | S-17 |
| <sup>1</sup> H NMR of Spectrum of <b>10c</b>  | S-18 |
| <sup>13</sup> C NMR of Spectrum of <b>10c</b> | S-19 |
| <sup>1</sup> H NMR of Spectrum of <b>10d</b>  | S-20 |
| <sup>13</sup> C NMR of Spectrum of <b>10d</b> | S-21 |
| <sup>1</sup> H NMR of Spectrum of <b>10e</b>  | S-22 |
| <sup>13</sup> C NMR of Spectrum of <b>10e</b> | S-23 |
| <sup>1</sup> H NMR of Spectrum of <b>10f</b>  | S-24 |
| <sup>13</sup> C NMR of Spectrum of <b>10f</b> | S-25 |

|                                               |      |
|-----------------------------------------------|------|
| $^1\text{H}$ NMR of Spectrum of <b>10g</b>    | S-26 |
| $^{13}\text{C}$ NMR of Spectrum of <b>10g</b> | S-27 |
| $^1\text{H}$ NMR of Spectrum of <b>10h</b>    | S-28 |
| $^{13}\text{C}$ NMR of Spectrum of <b>10h</b> | S-29 |

$^1\text{H}$  NMR (400 MHz,  $\text{DMSO-d}_6$ )

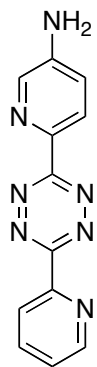

**8**

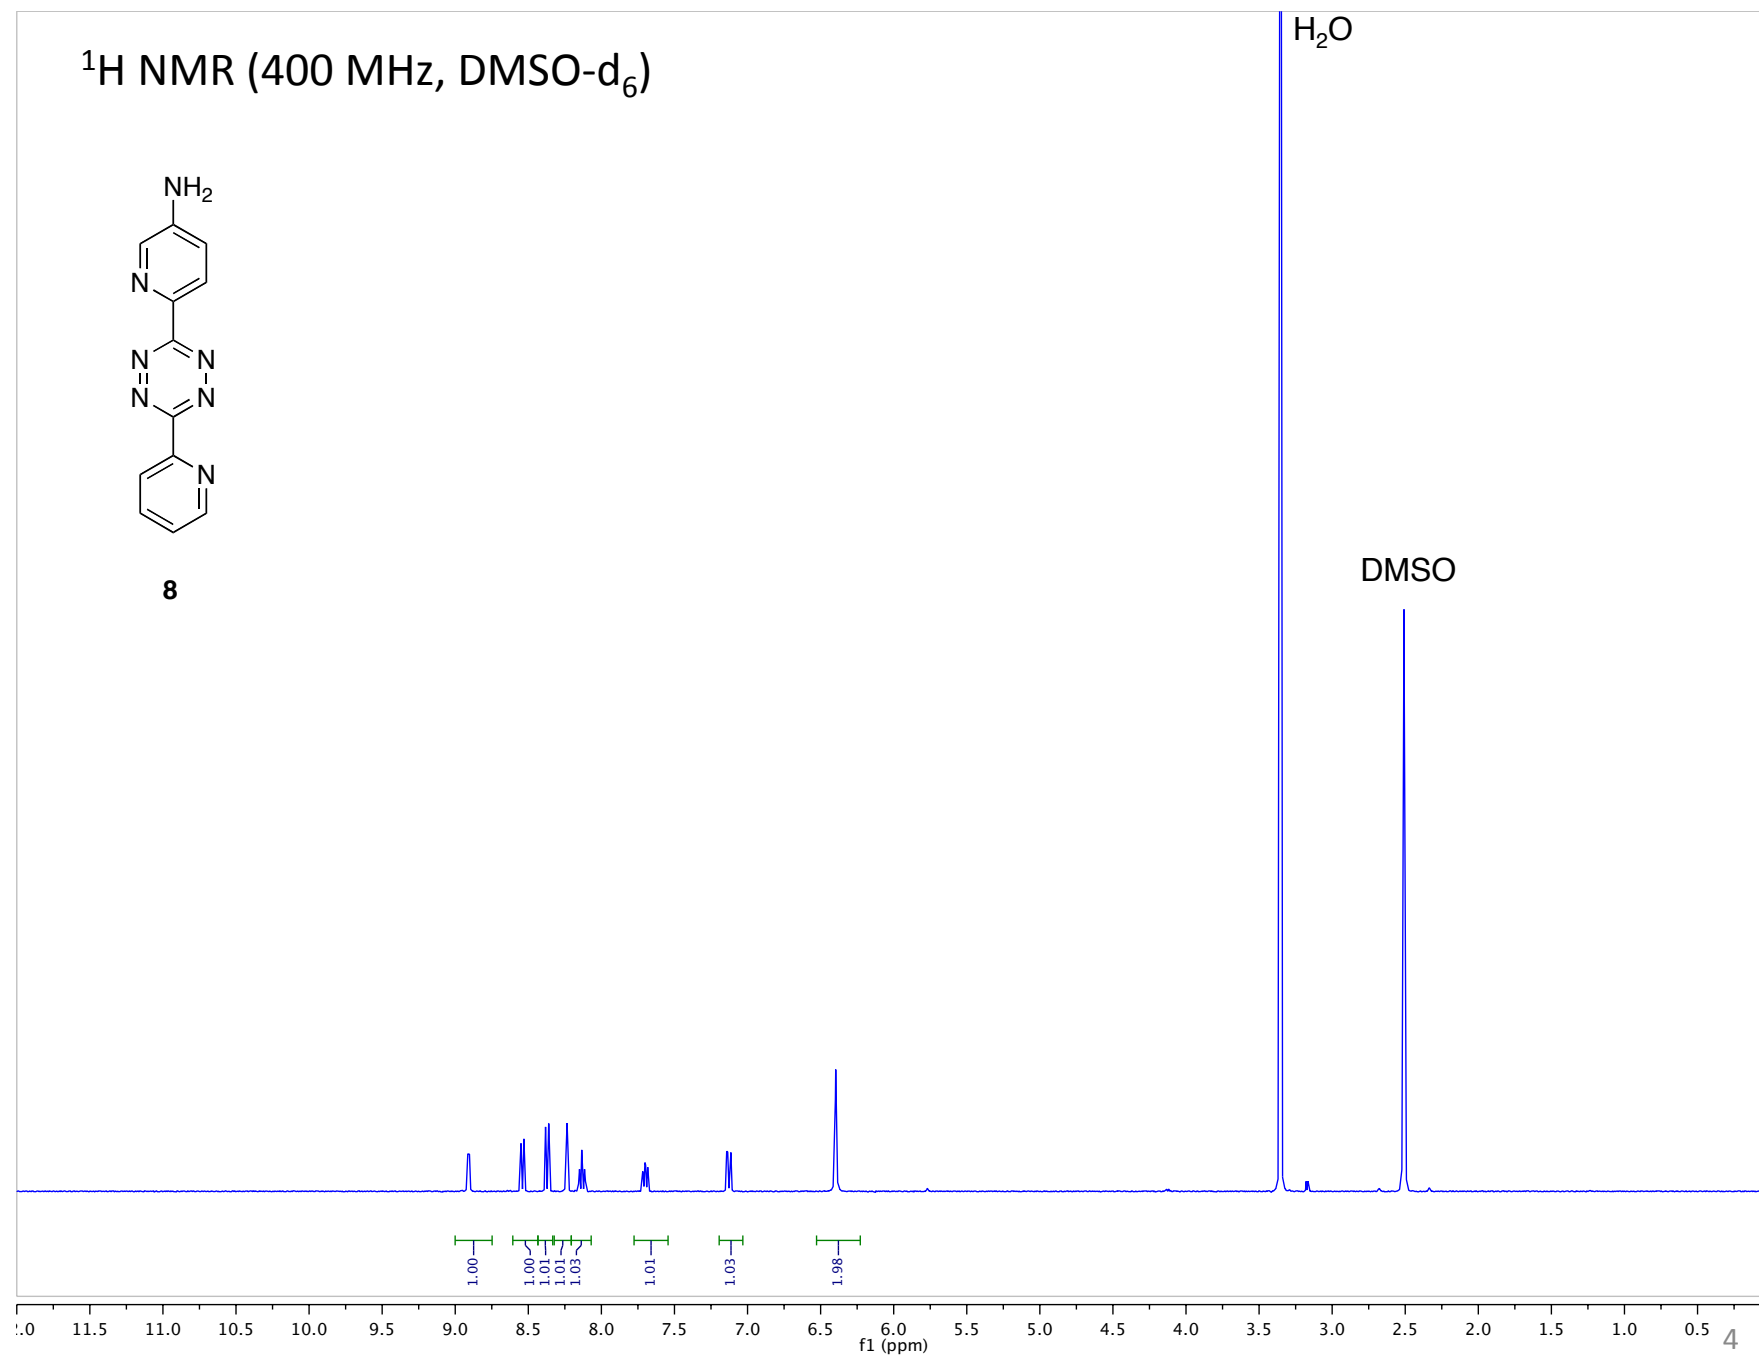

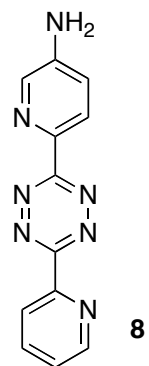

$^{13}\text{C}$  NMR (100 MHz, DMSO- $\text{d}_6$ )

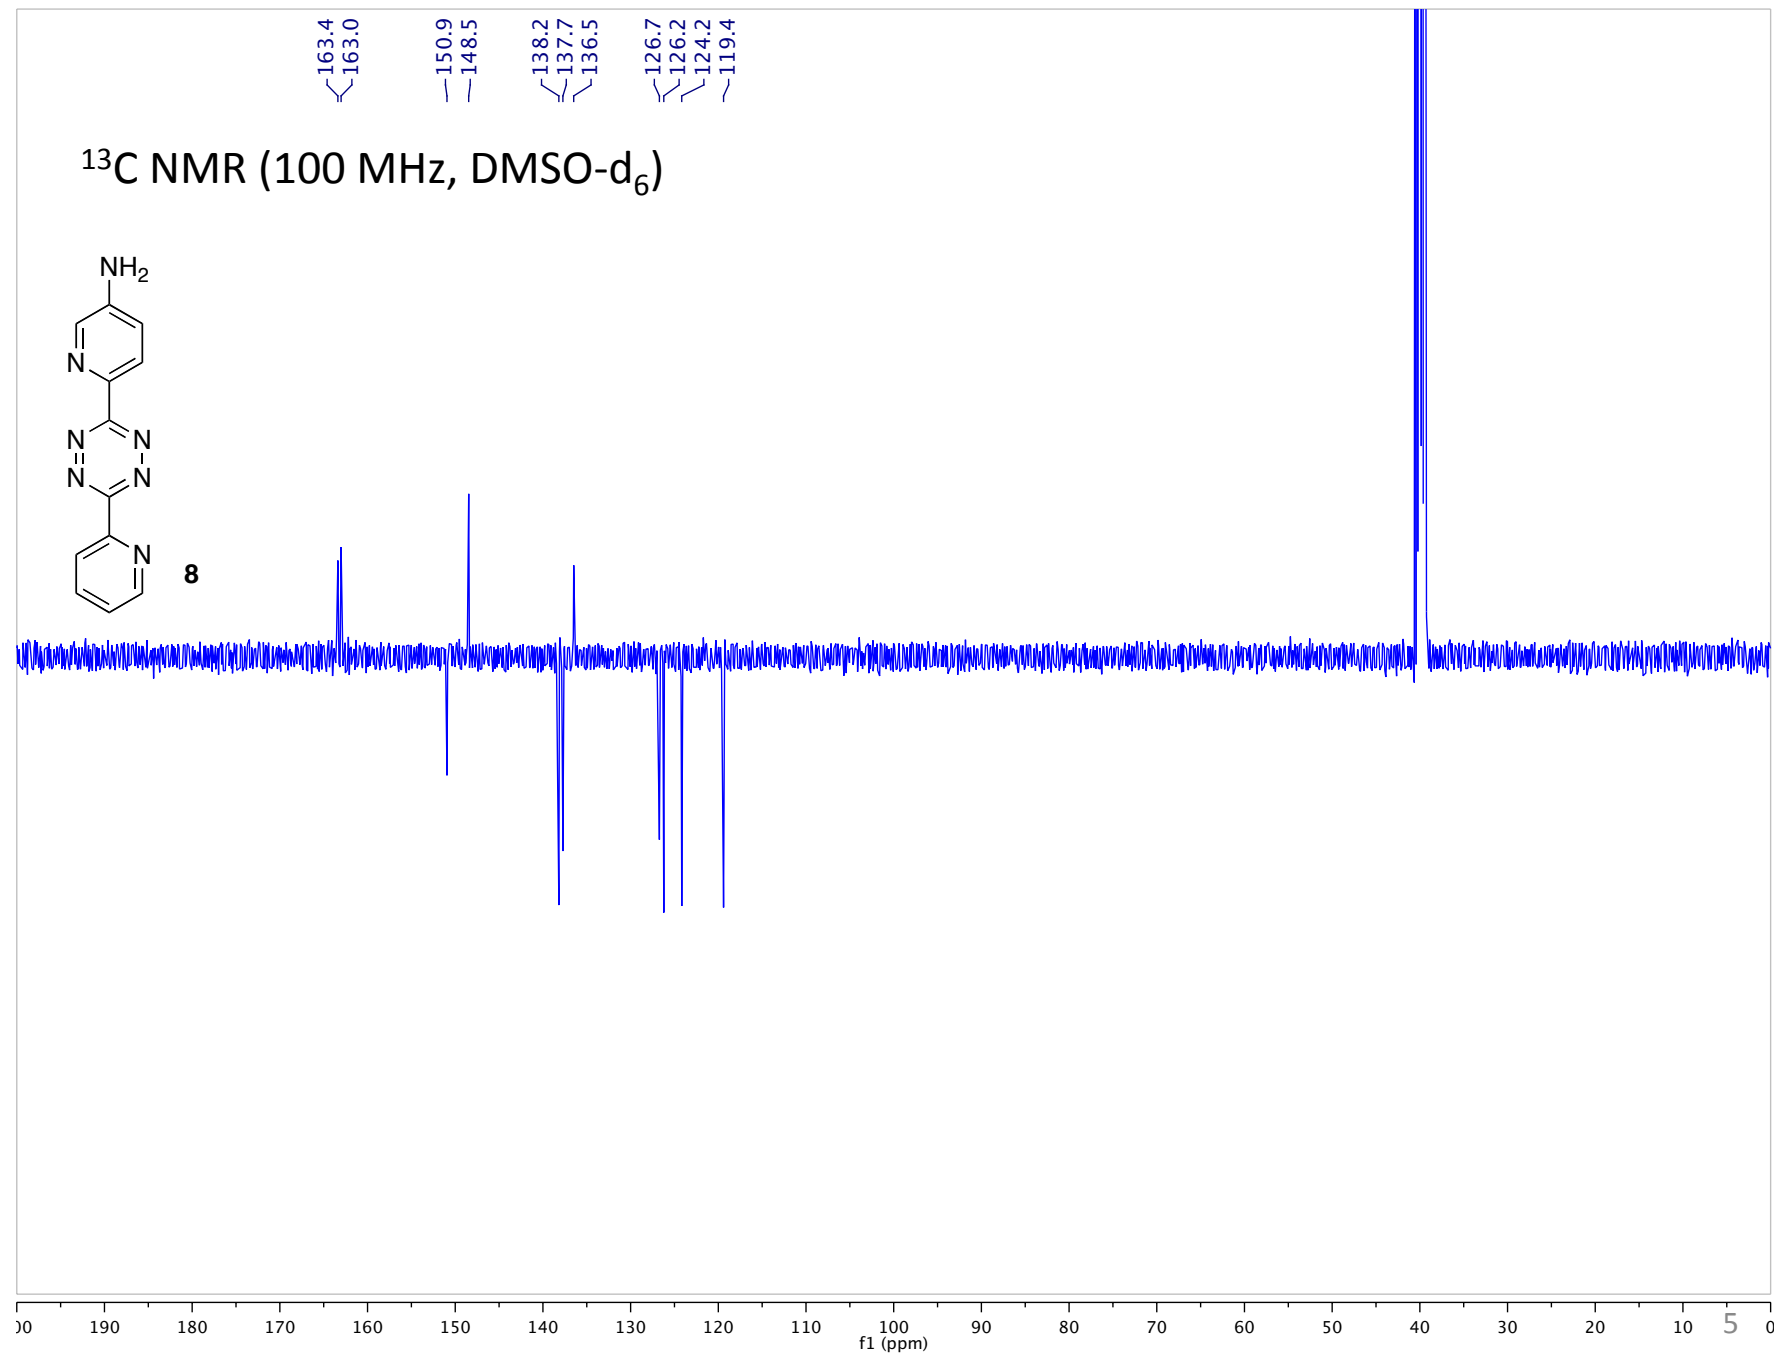

$^1\text{H}$  NMR (400 MHz, DMSO- $\text{d}_6$ )

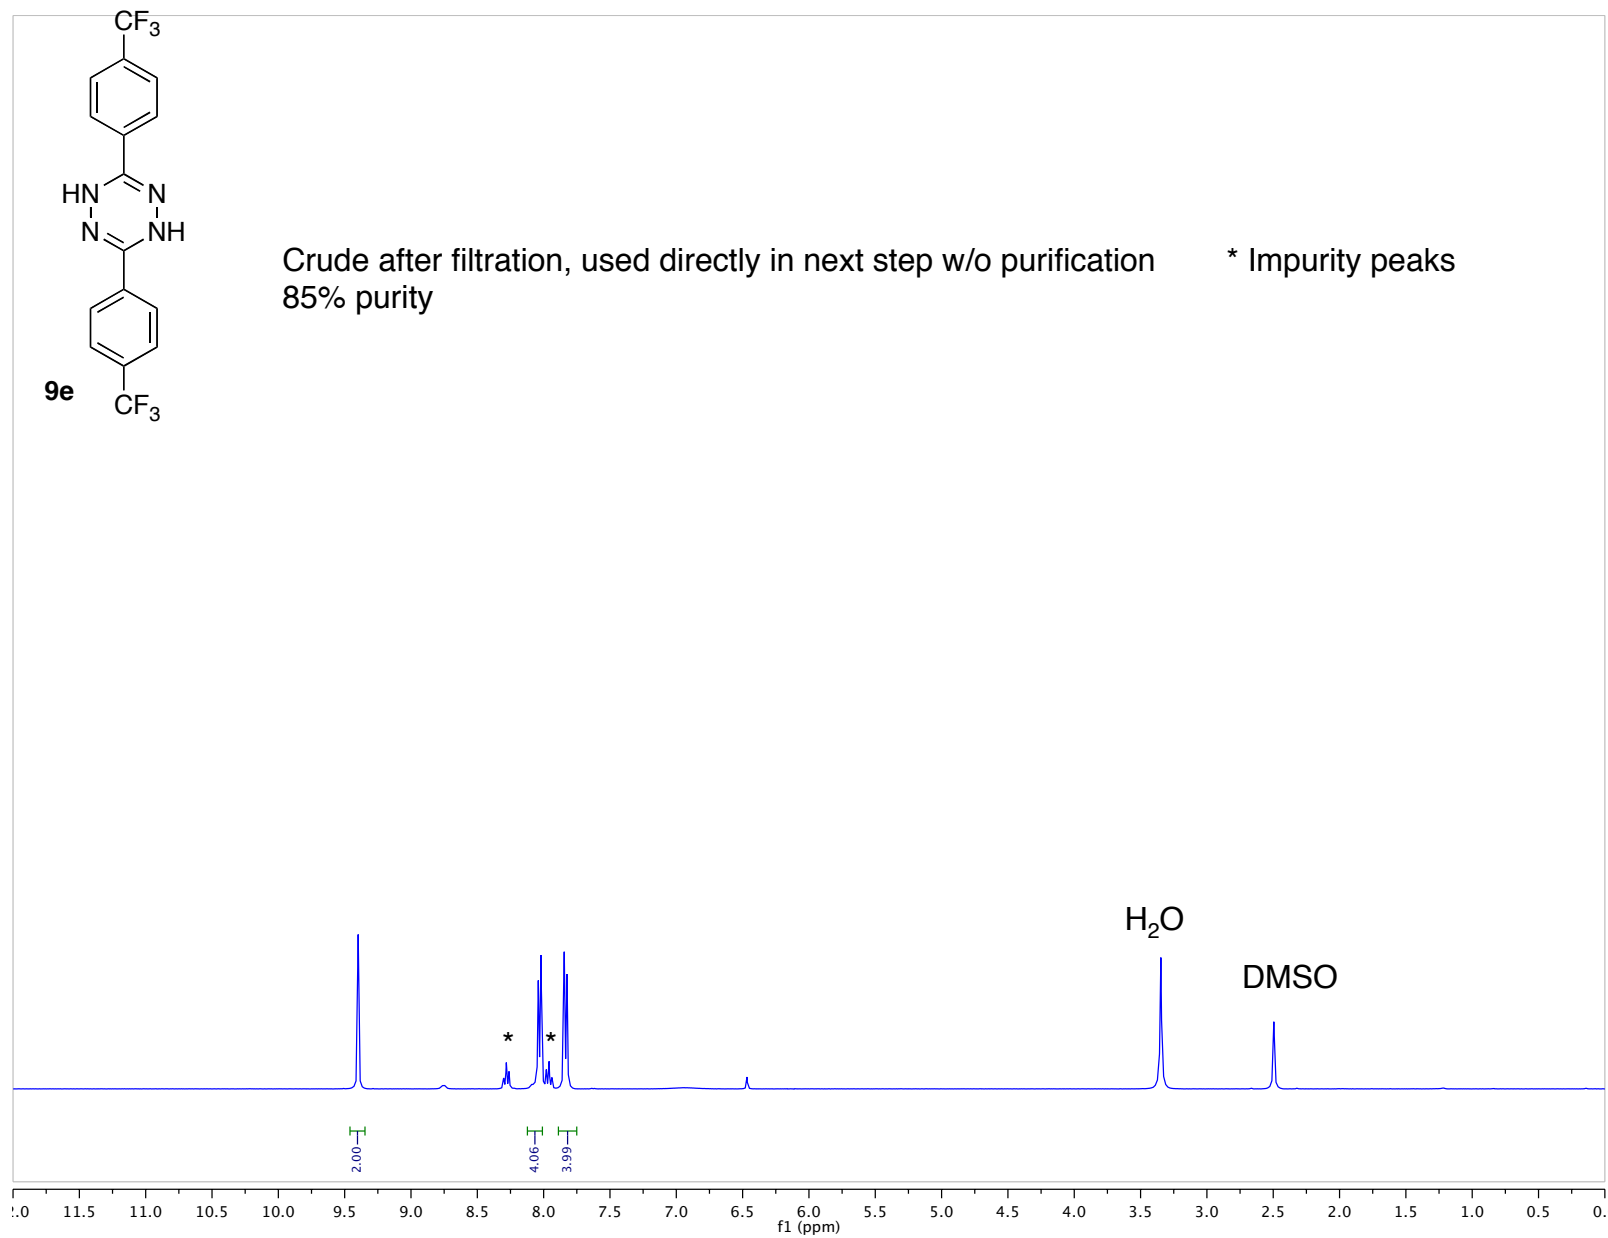

$^{13}\text{C}$  NMR (100 MHz, DMSO- $\text{d}_6$ )

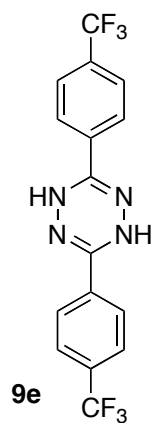

Crude after filtration, used directly in next step w/o purification  
85% purity

\* The impurity peaks

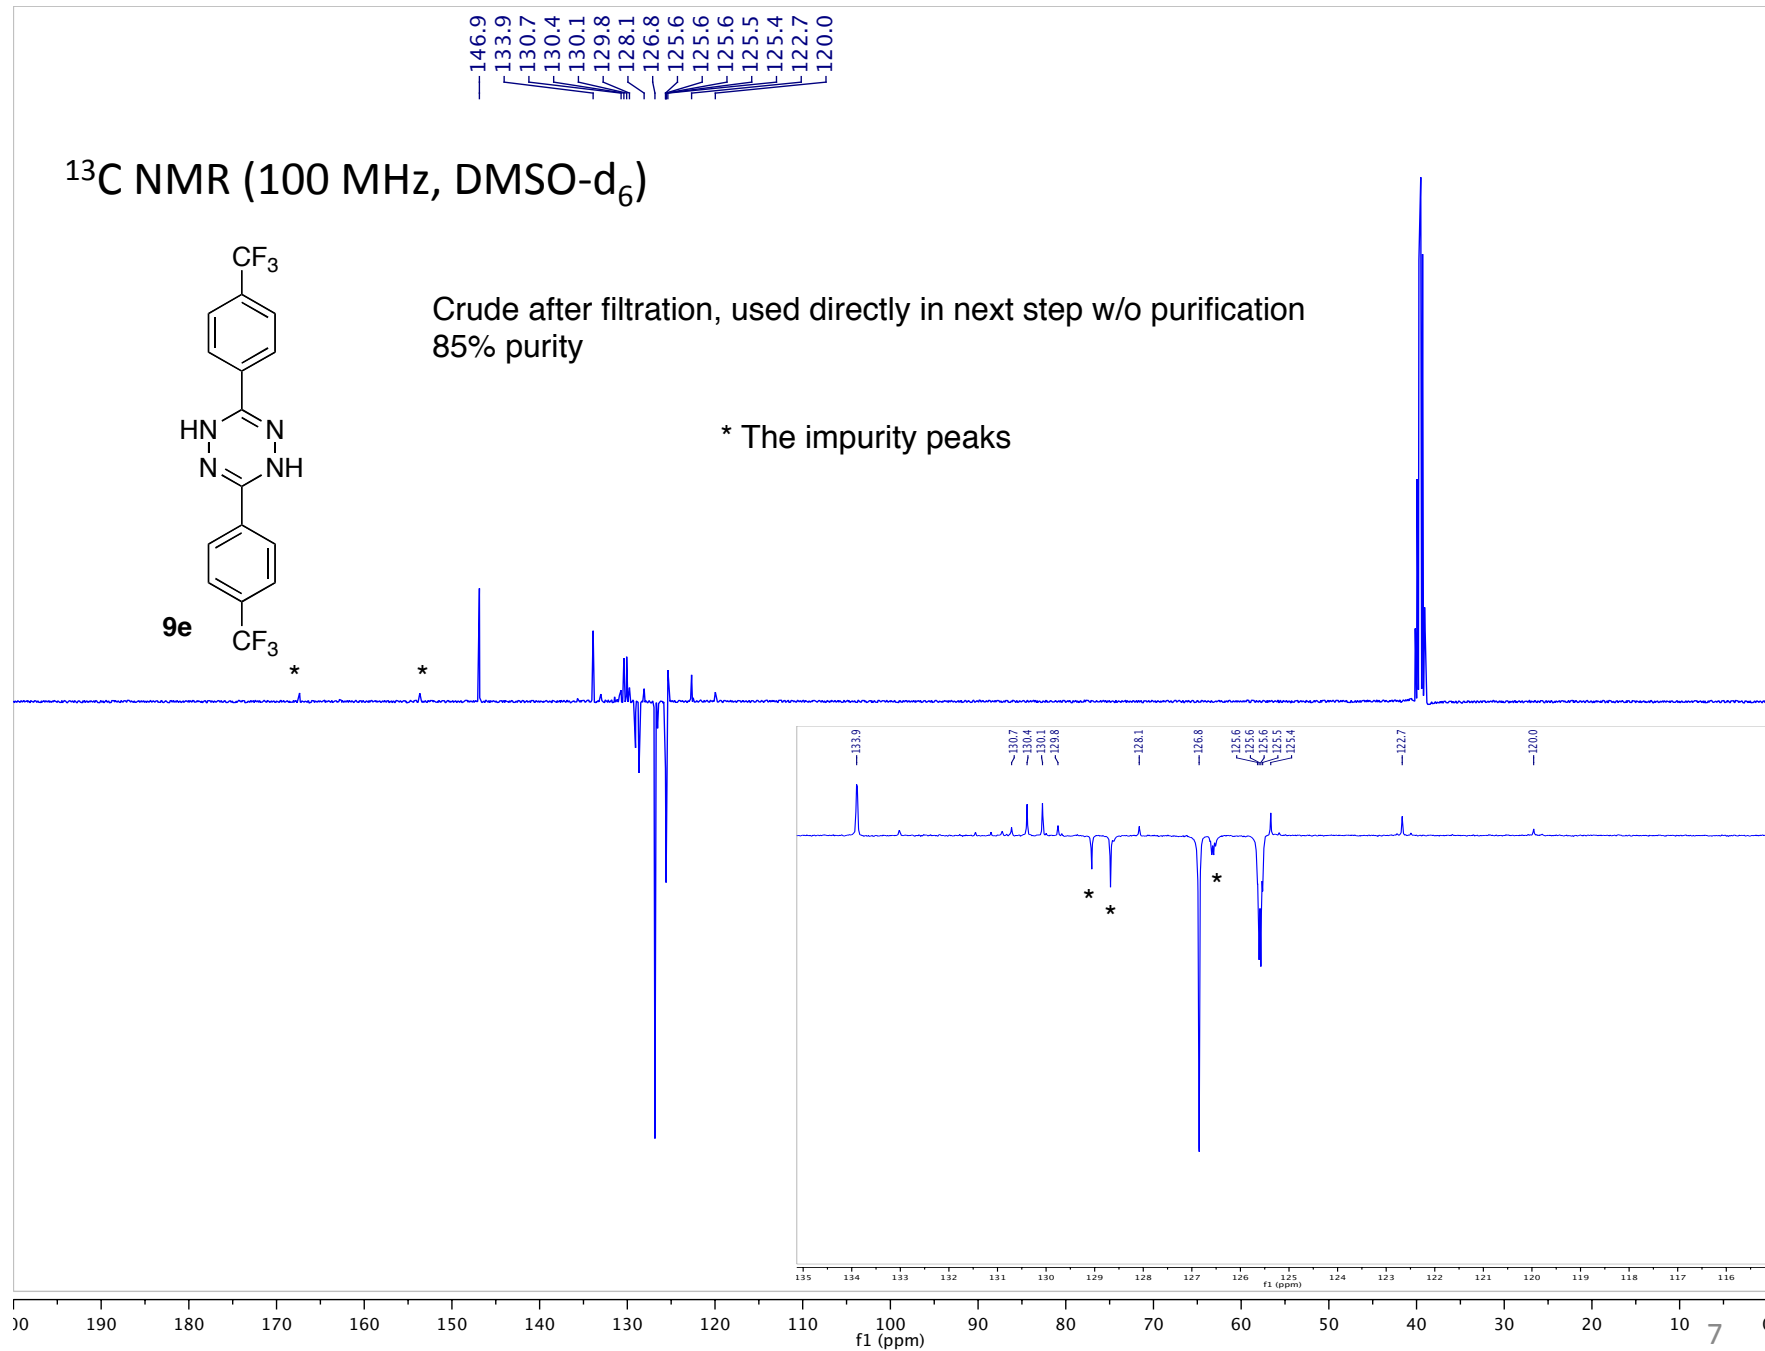

$^1\text{H}$  NMR (400 MHz,  $\text{DMSO-d}_6$ )

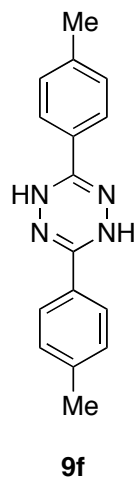

Crude after filtration, used directly in next step w/o purification  
83% purity

\* Impurity peaks

DMSO

$\text{H}_2\text{O}$

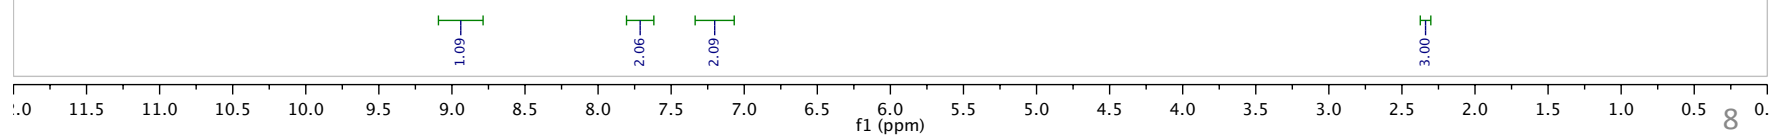

<sup>13</sup>C NMR (100 MHz, DMSO-d<sub>6</sub>)

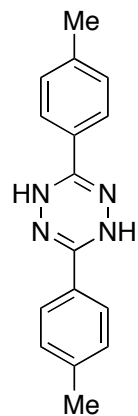

9f

Crude after filtration, used directly in next step w/o purification  
83% purity

\* Impurity peaks

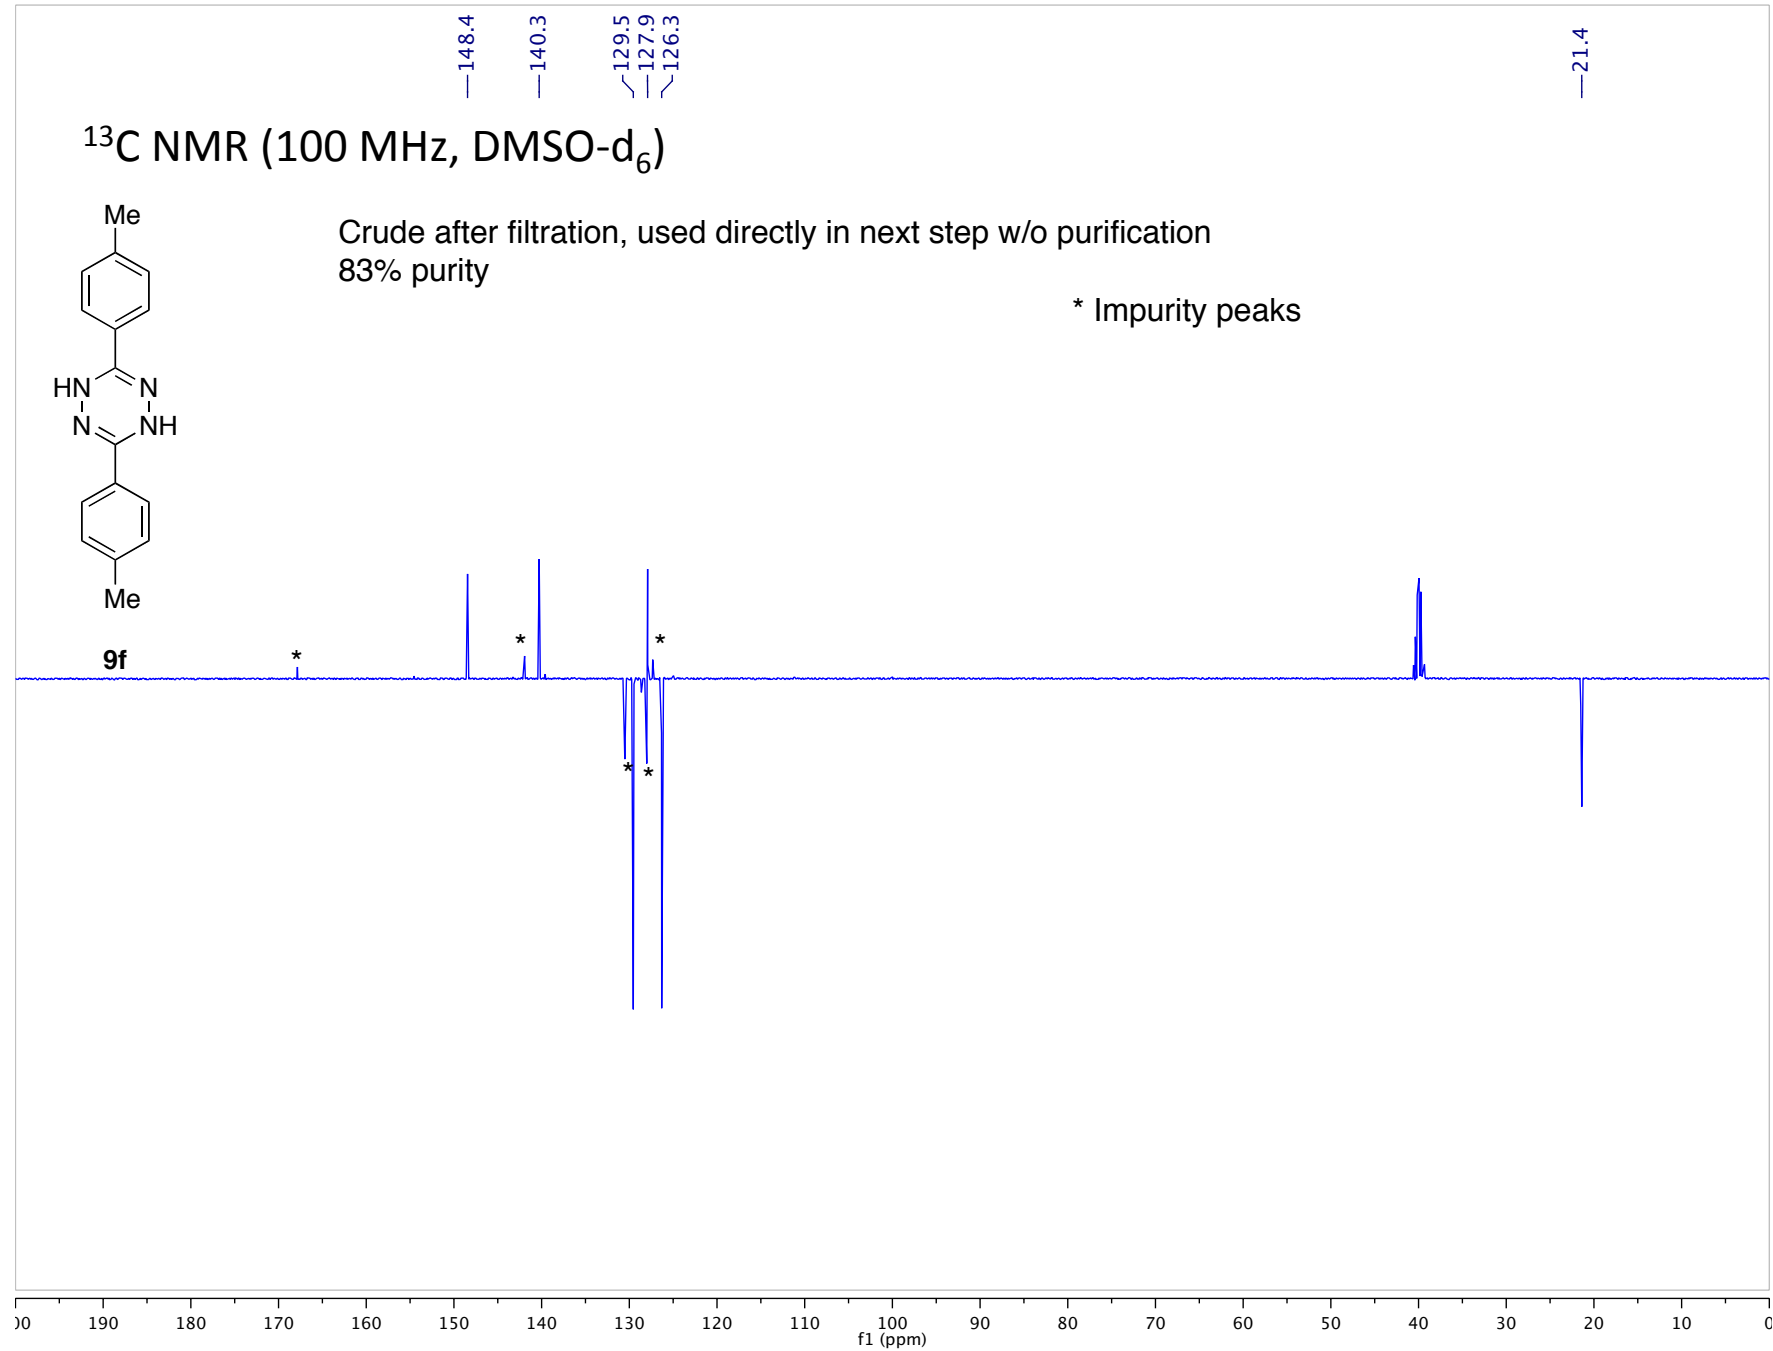

<sup>1</sup>H NMR (400 MHz, DMSO-d<sub>6</sub>)

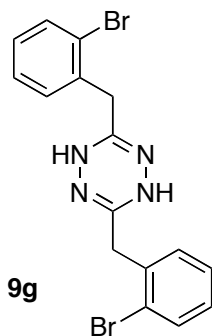

Crude after filtration, used directly in next step w/o purification  
95% purity

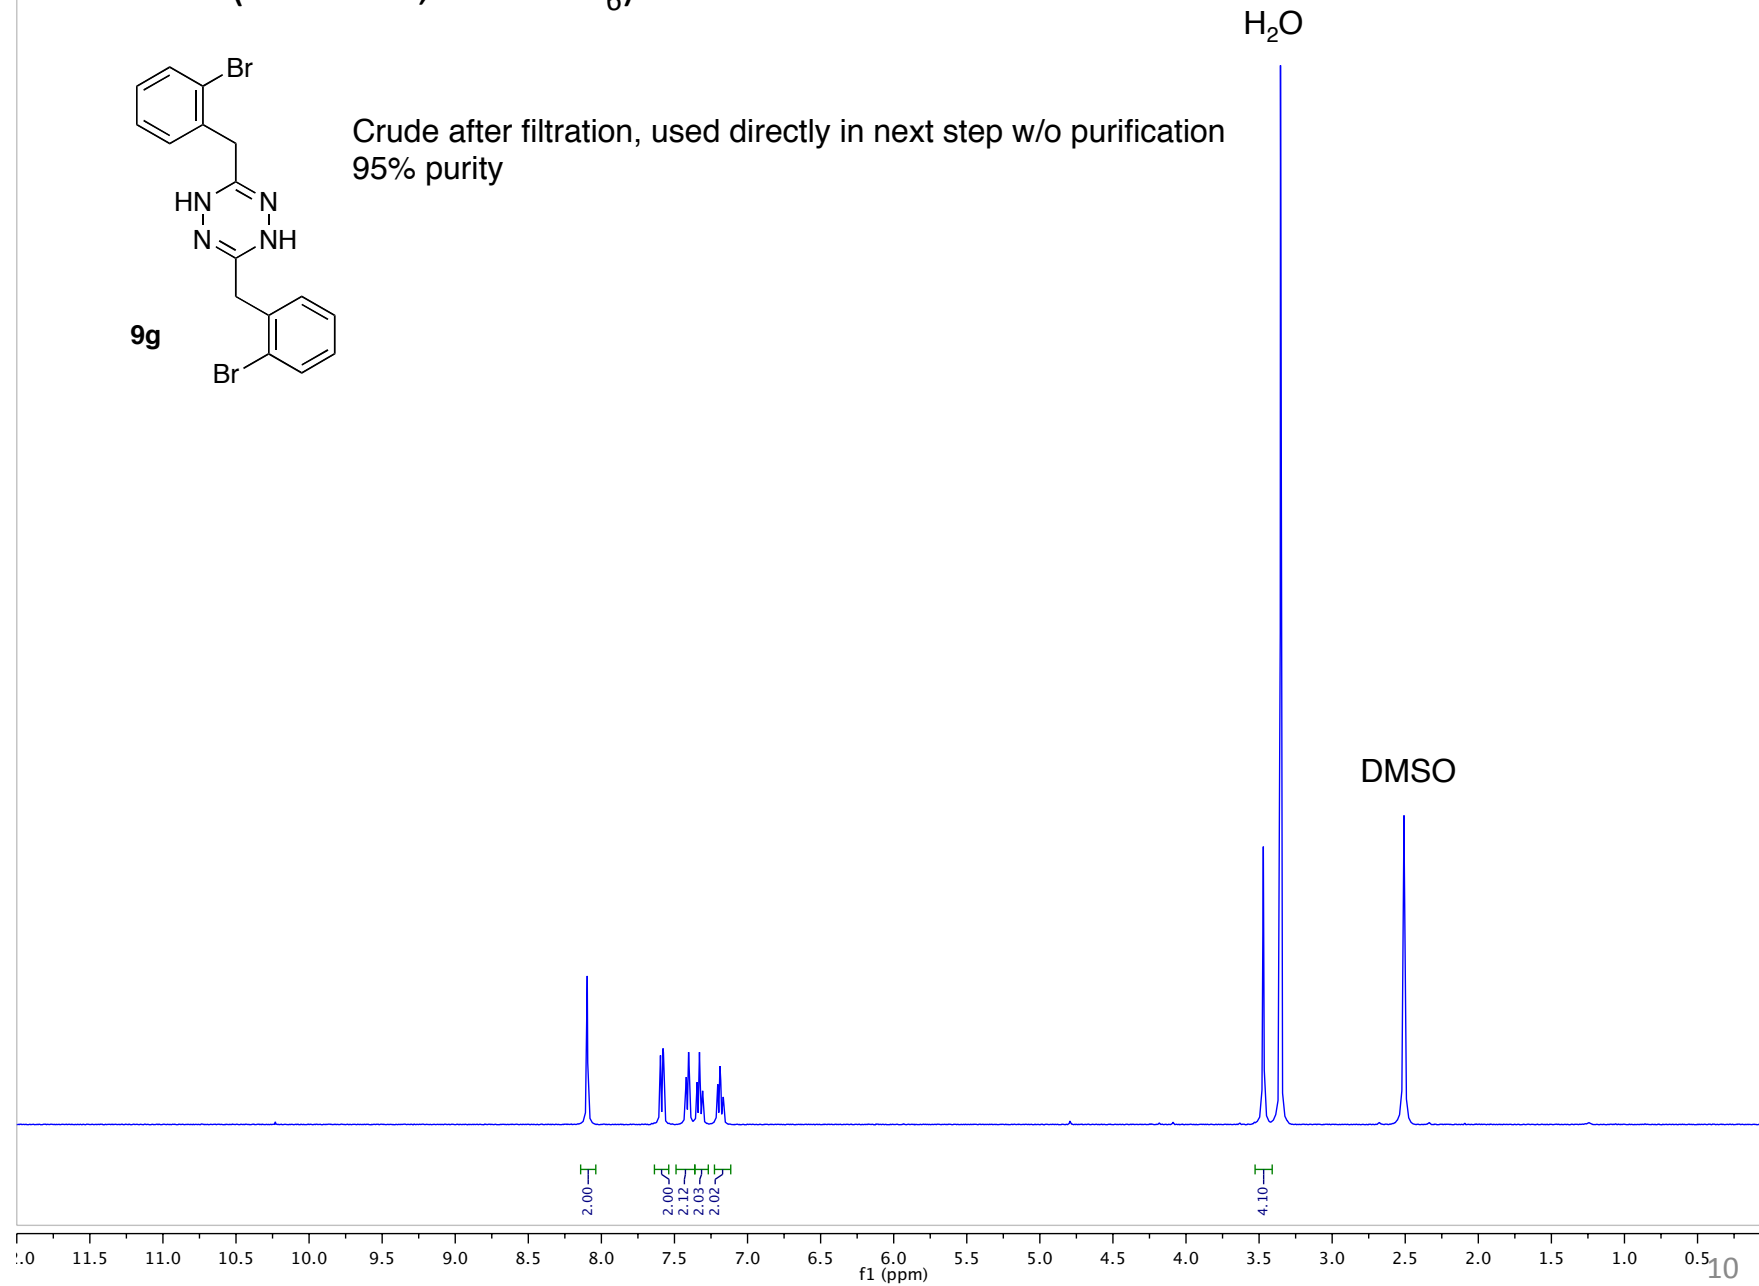

$^{13}\text{C}$  NMR (100 MHz, DMSO- $\text{d}_6$ )

Crude after filtration, used directly in next step w/o purification  
95% purity

\* Impurity peaks

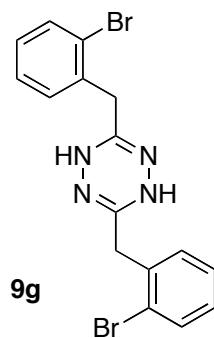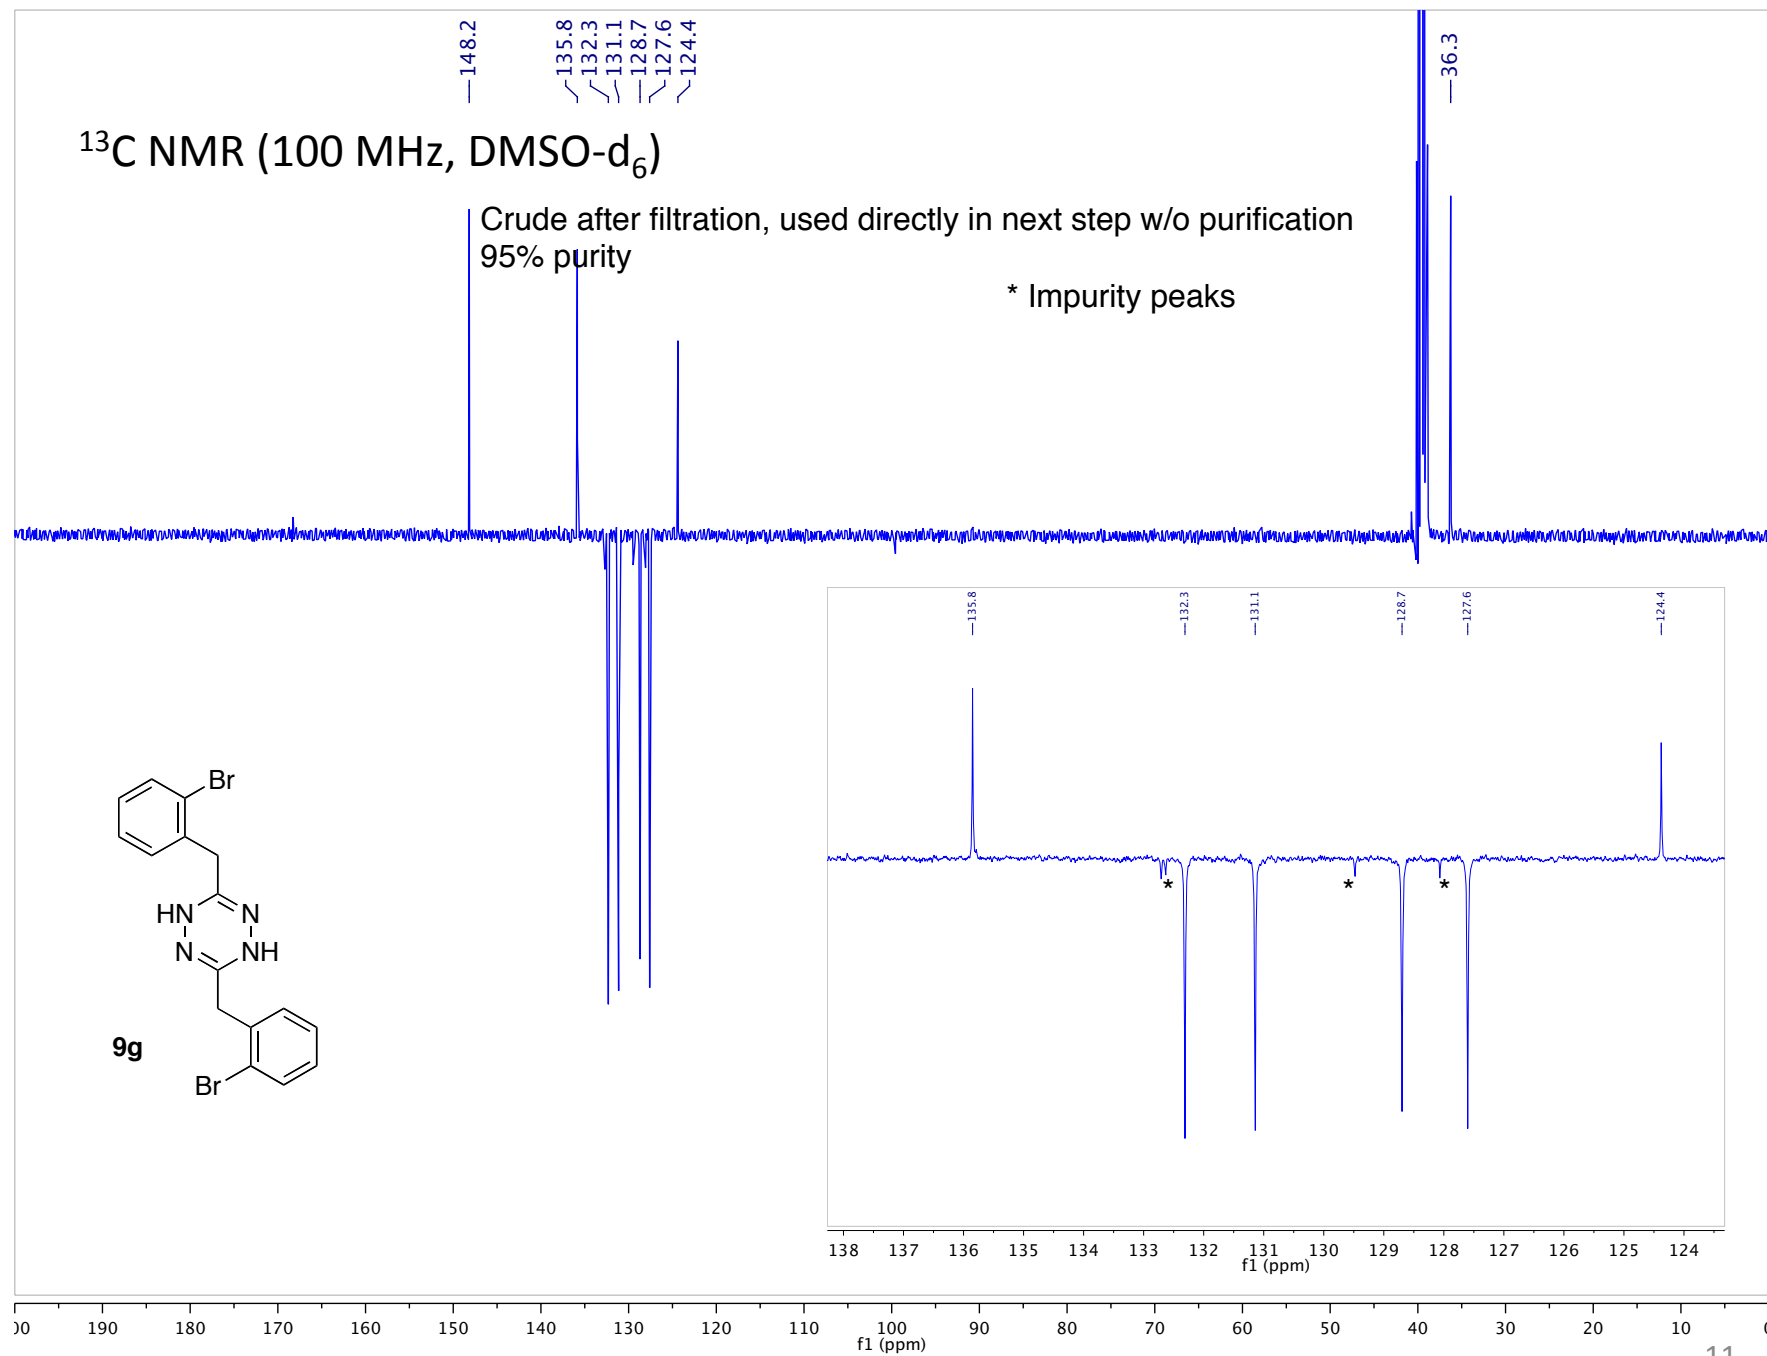

$^1\text{H}$  NMR (400 MHz, DMSO- $\text{d}_6$ )

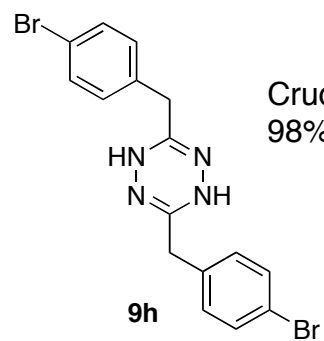

Crude after filtration, used directly in next step w/o purification  
98% purity

$\text{H}_2\text{O}$

DMSO

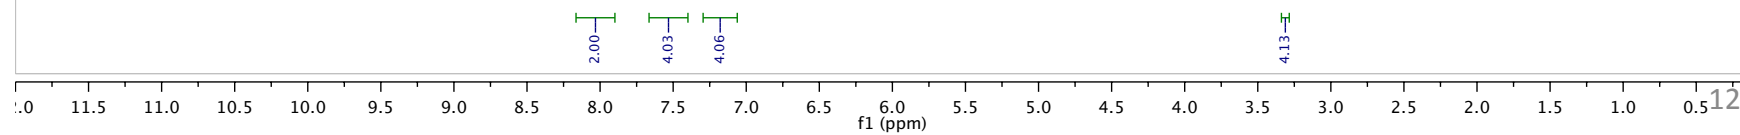

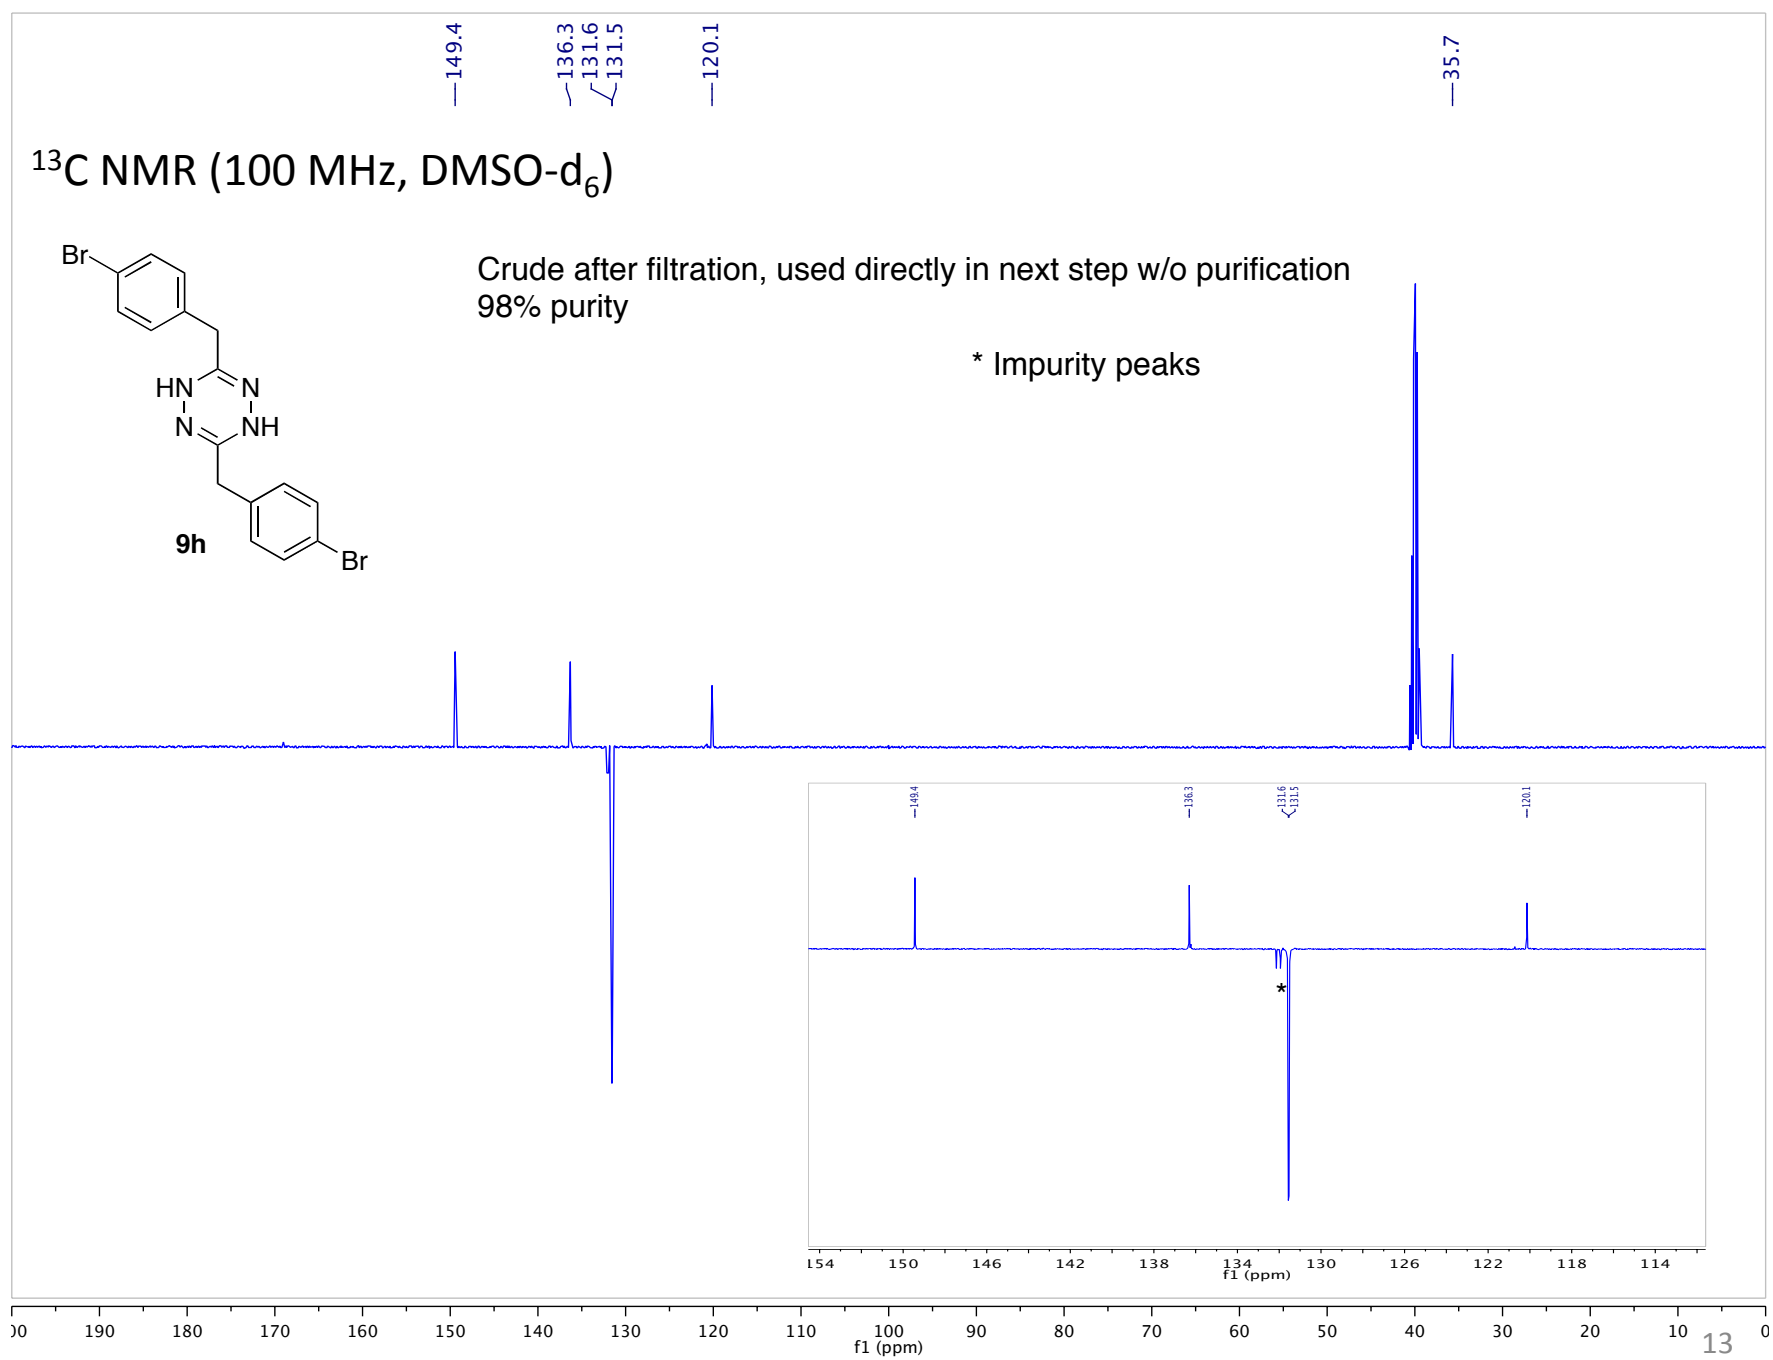

$^1\text{H}$  NMR (400 MHz,  $\text{CDCl}_3$ )

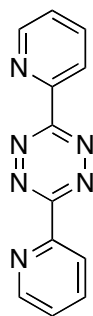

**10a**

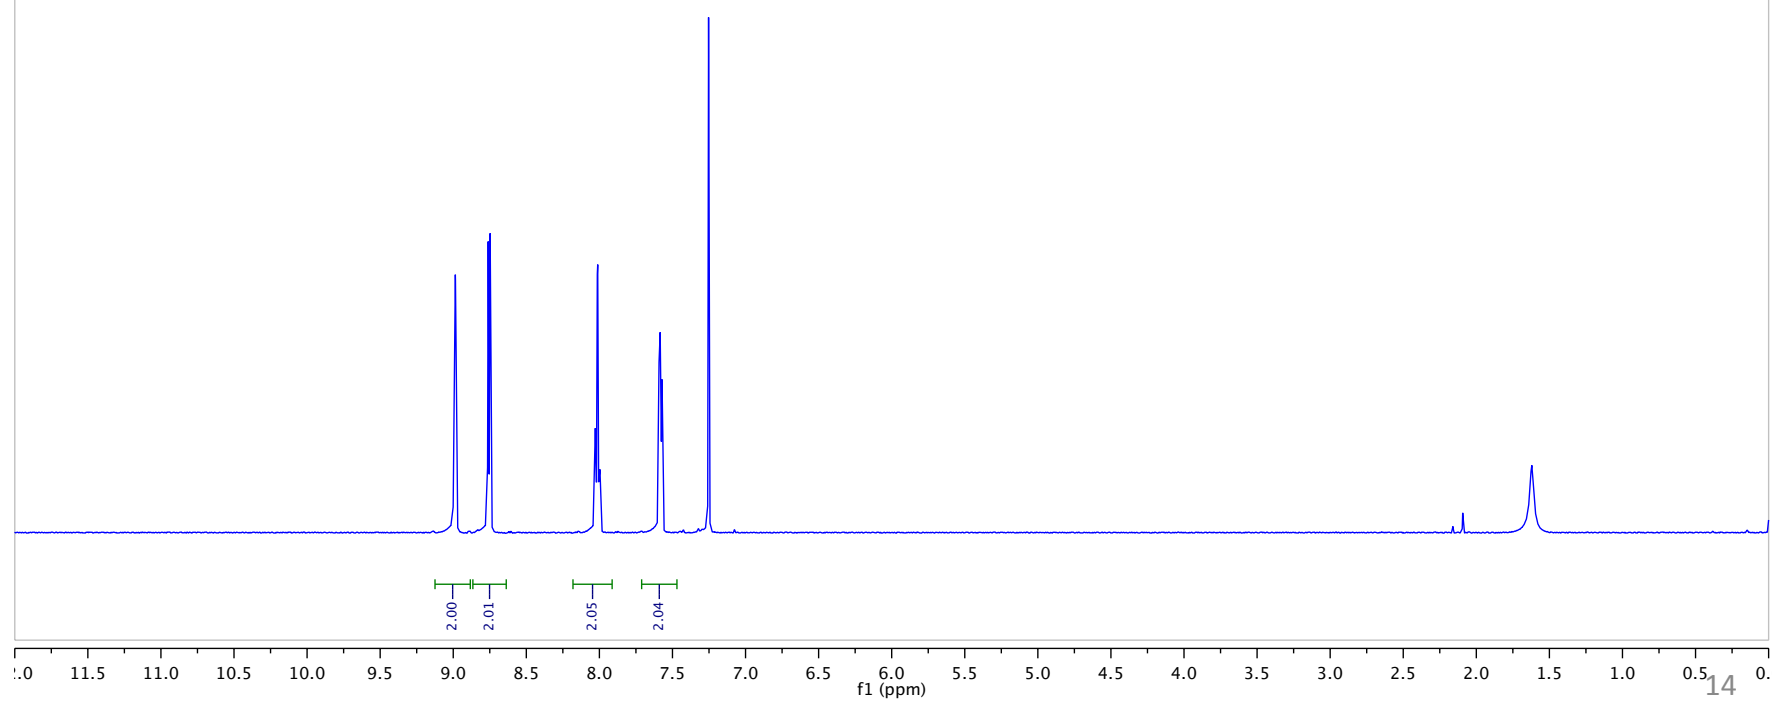

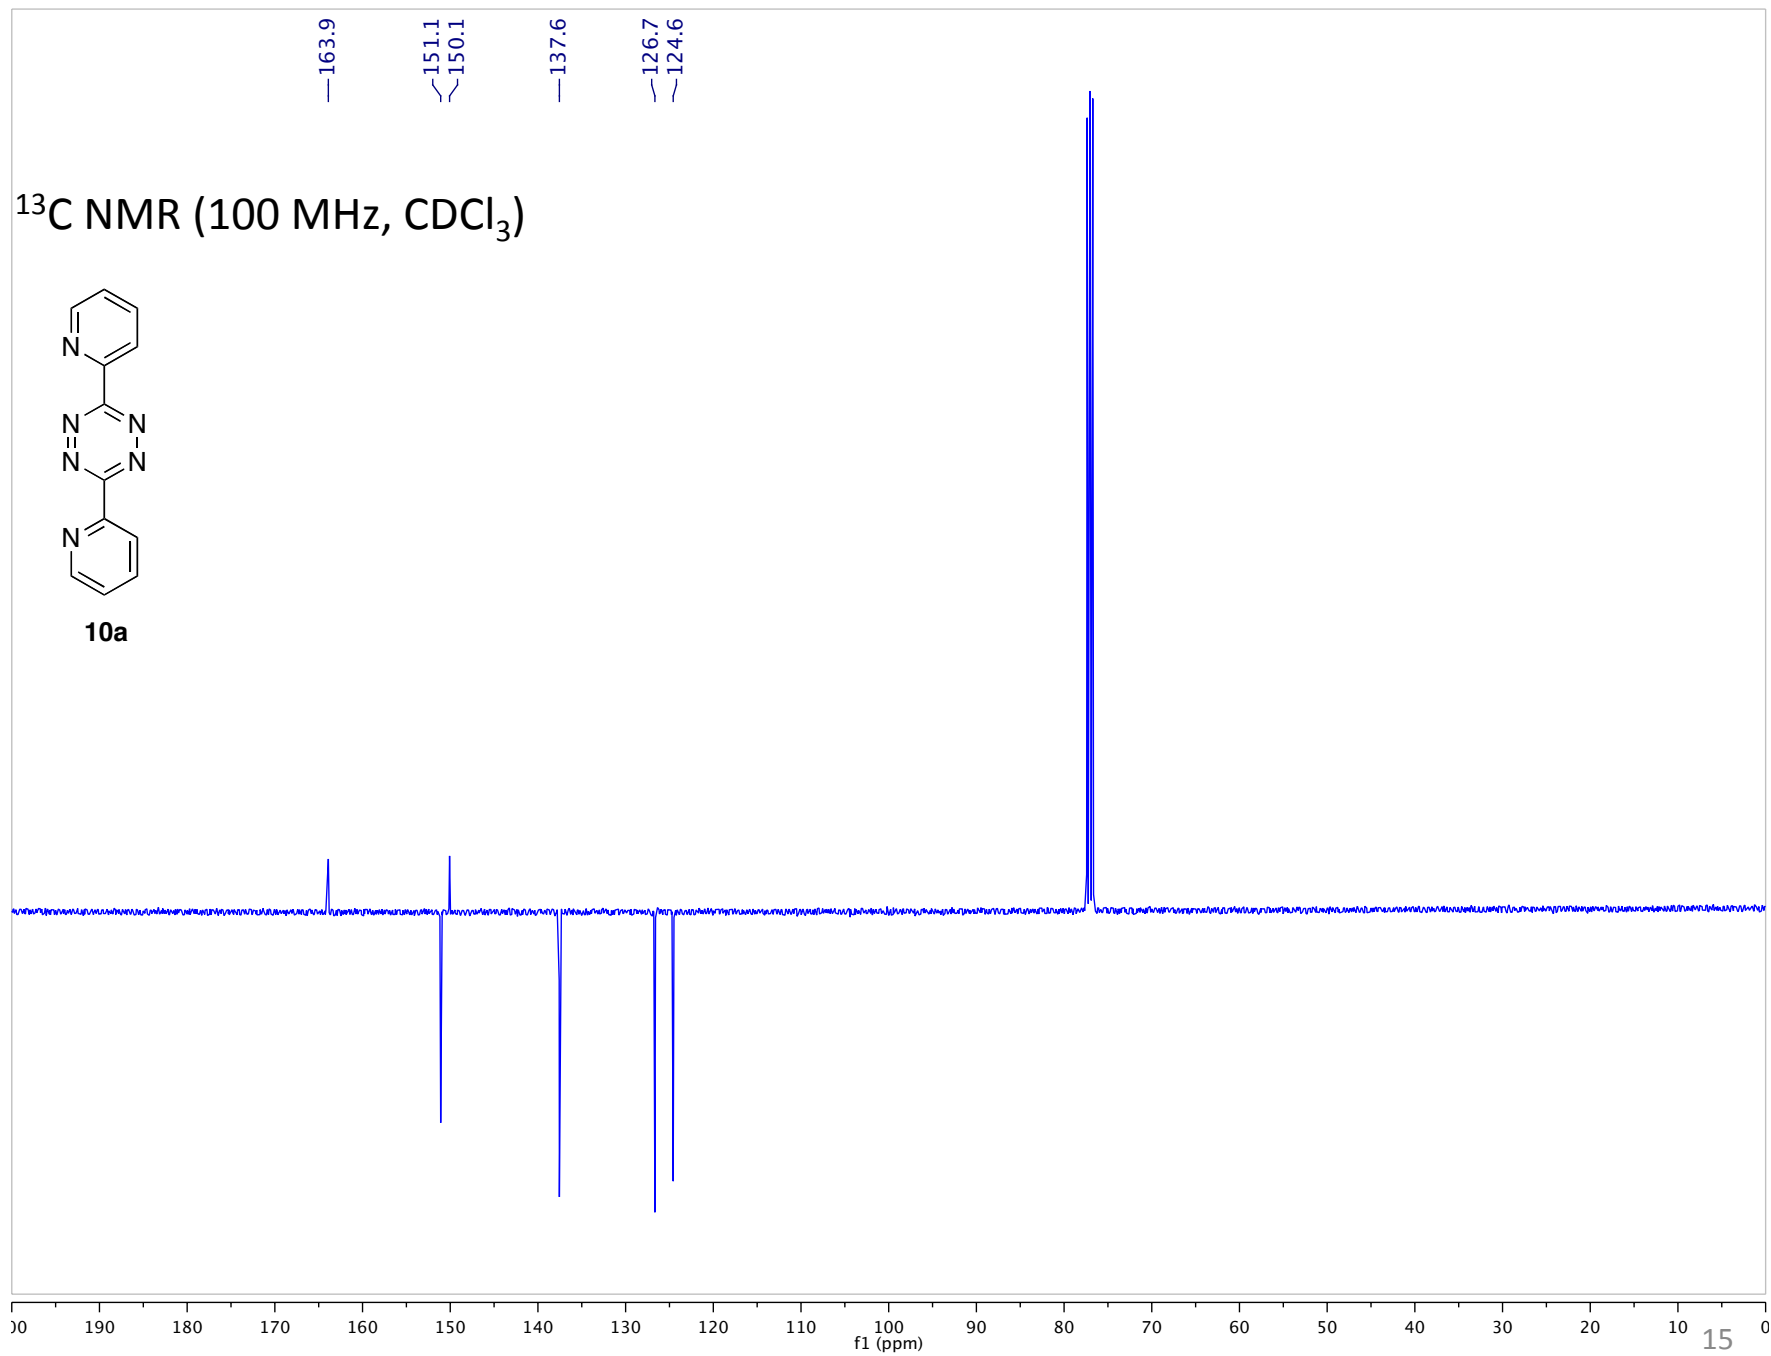

$^1\text{H}$  NMR (400 MHz, DMSO- $\text{d}_6$ )

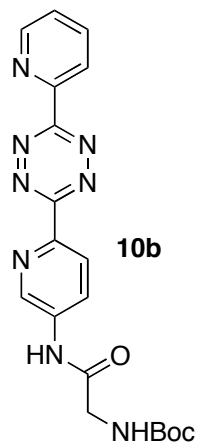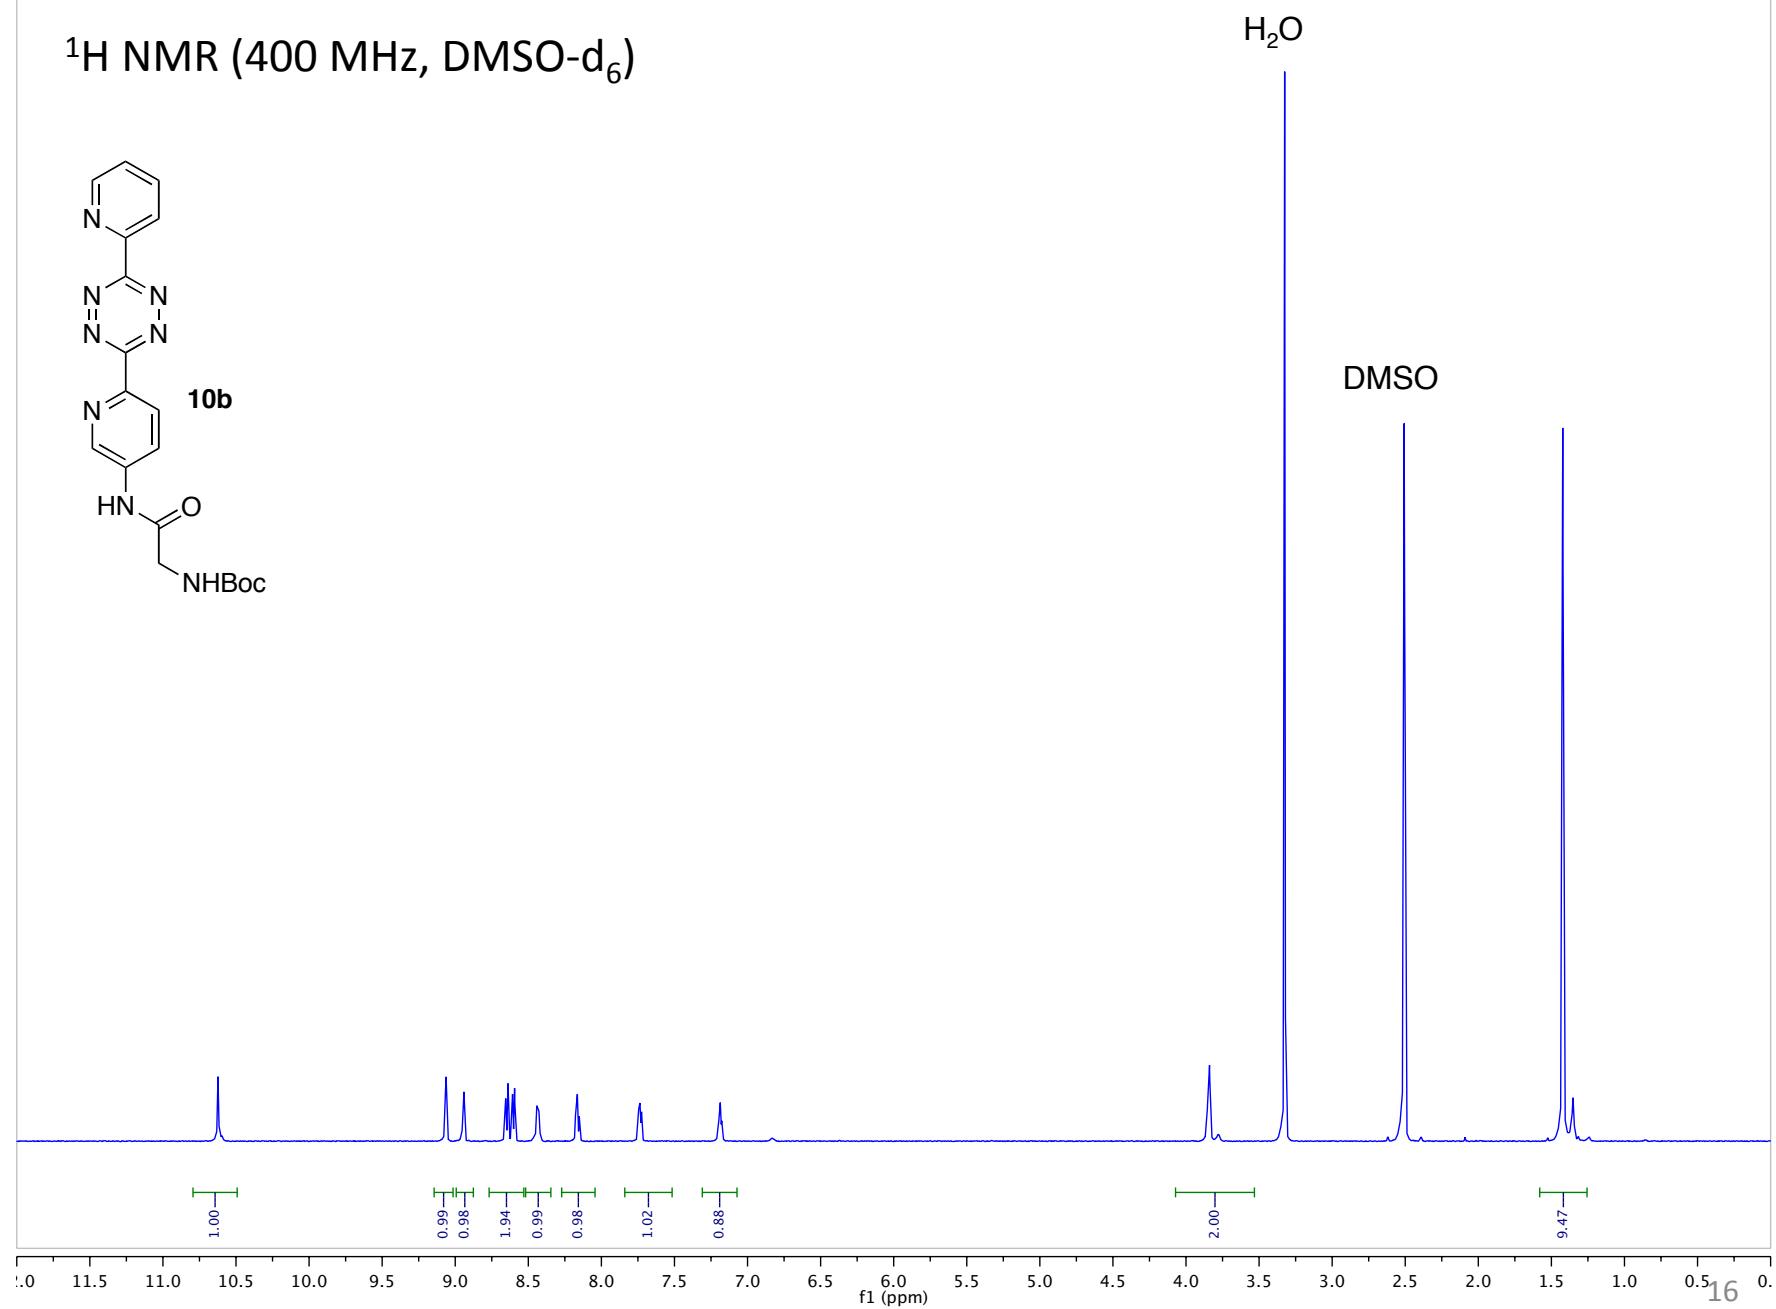

<sup>13</sup>C NMR (100 MHz, DMSO-d<sub>6</sub>)

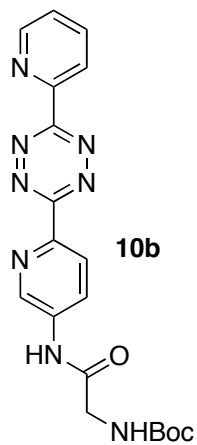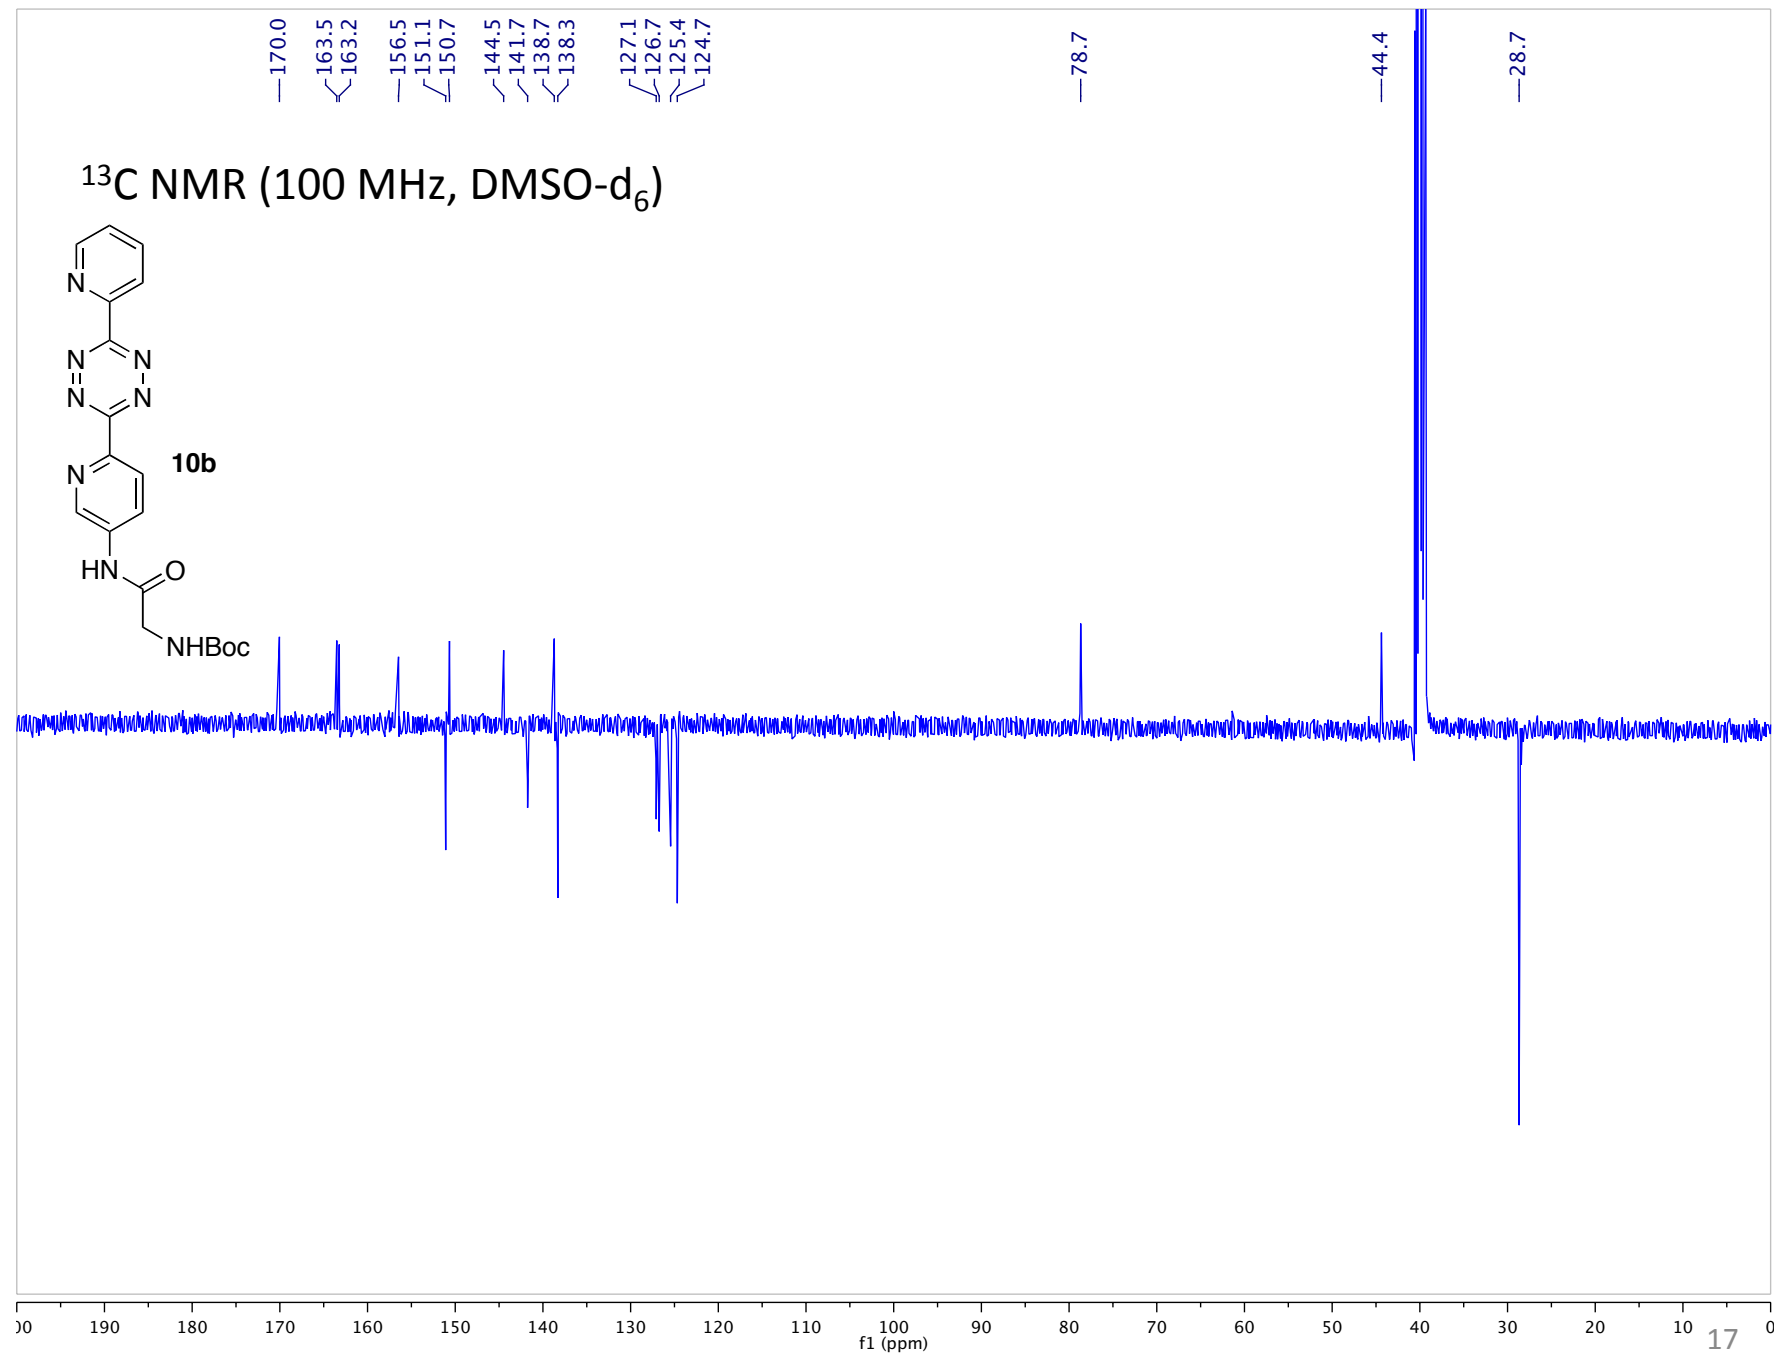

$^1\text{H}$  NMR (400 MHz,  $\text{CDCl}_3$ )

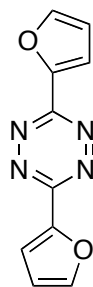

**10c**

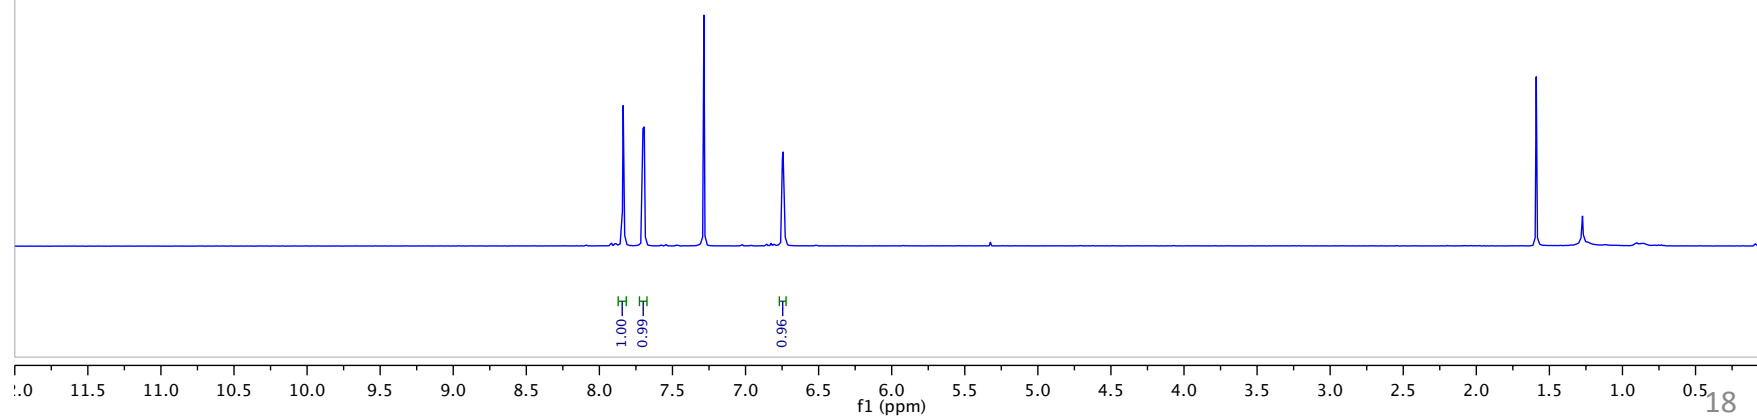

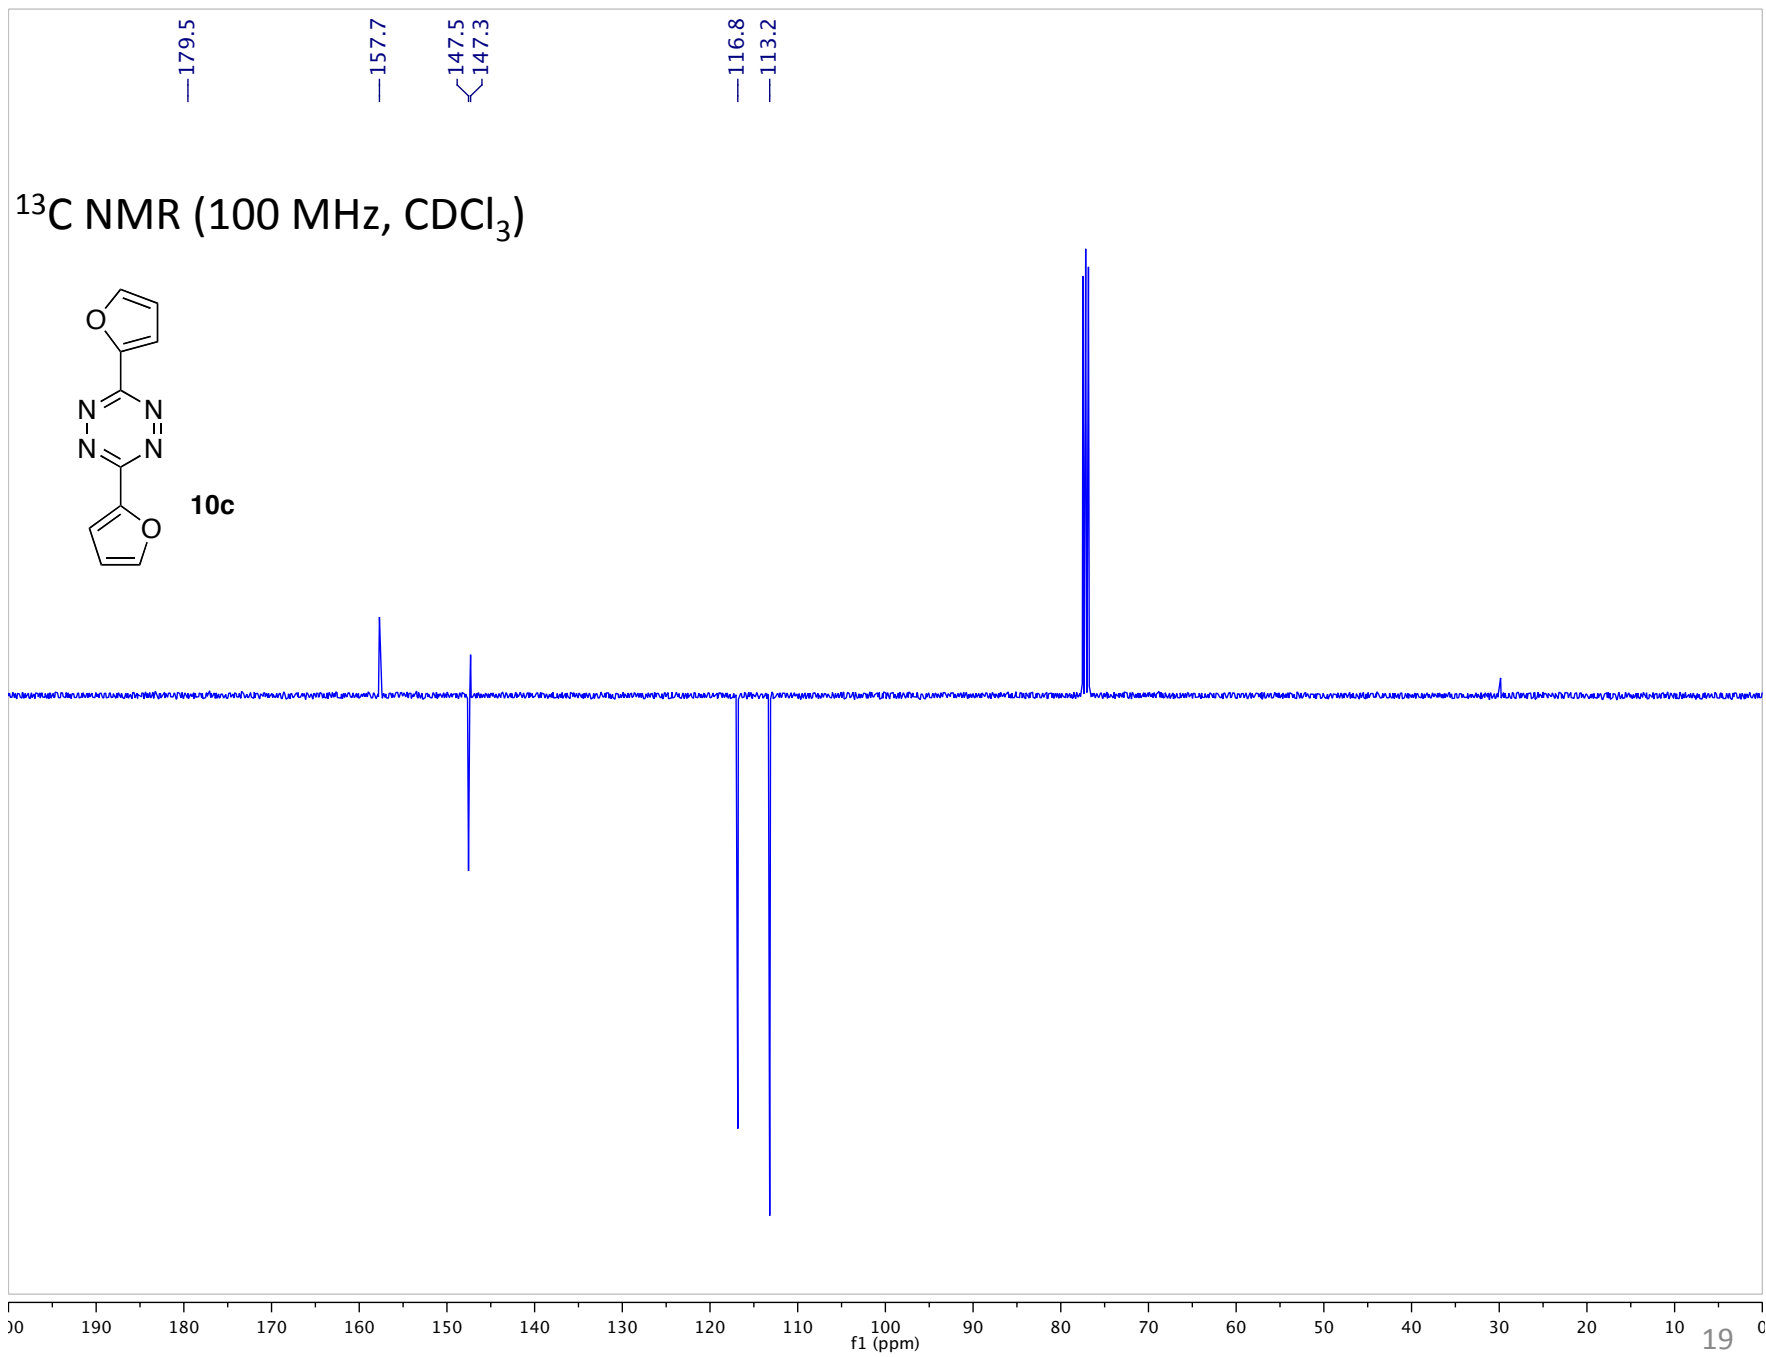

$^1\text{H}$  NMR (400 MHz, DMSO- $\text{d}_6$ )

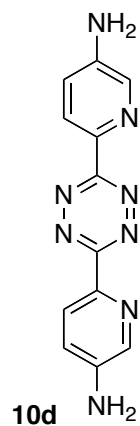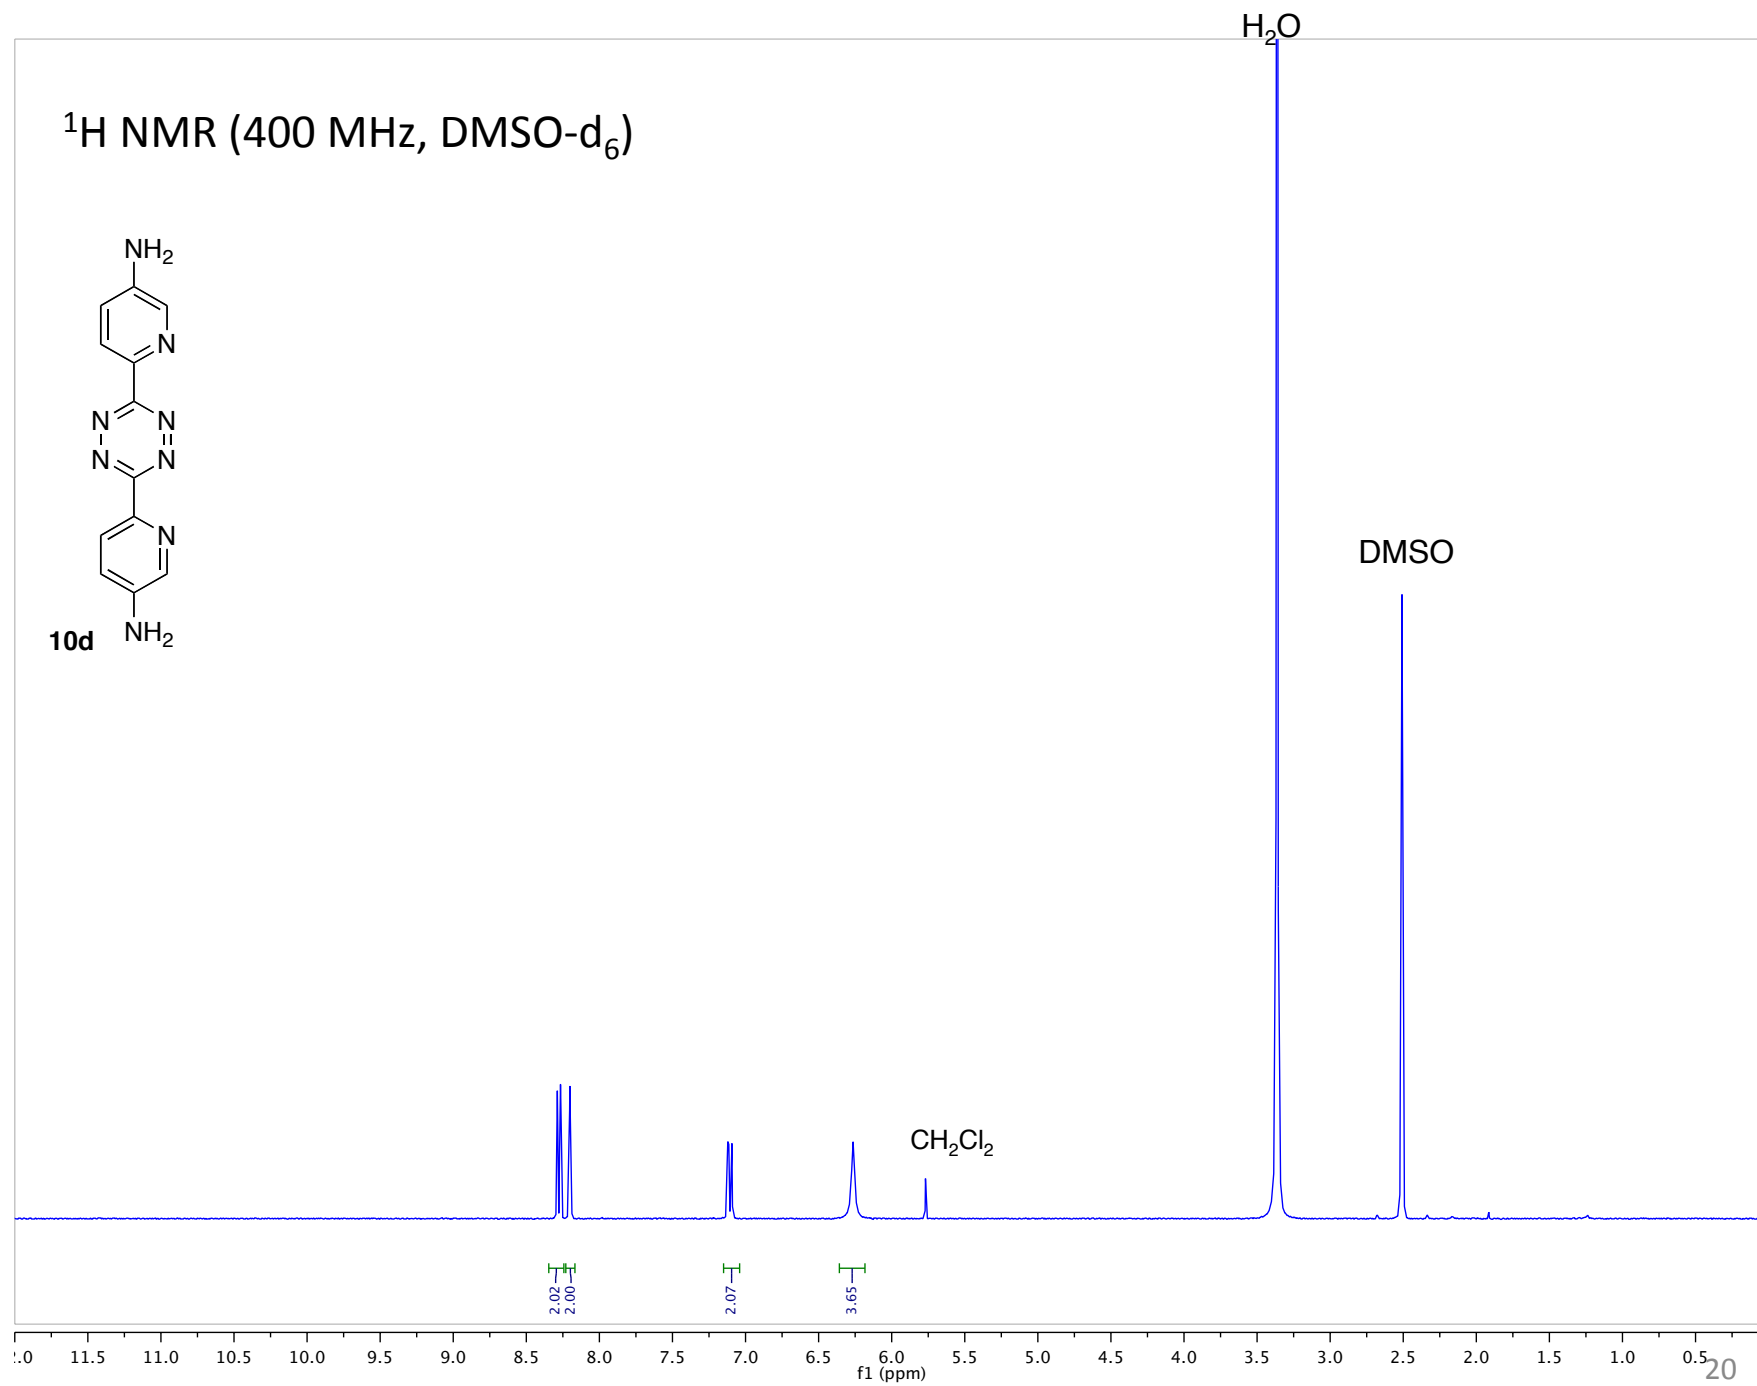

$^{13}\text{C}$  NMR (100 MHz, DMSO- $\text{d}_6$ )

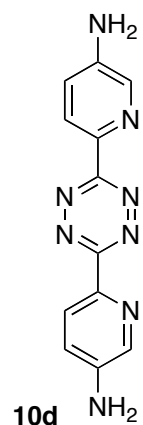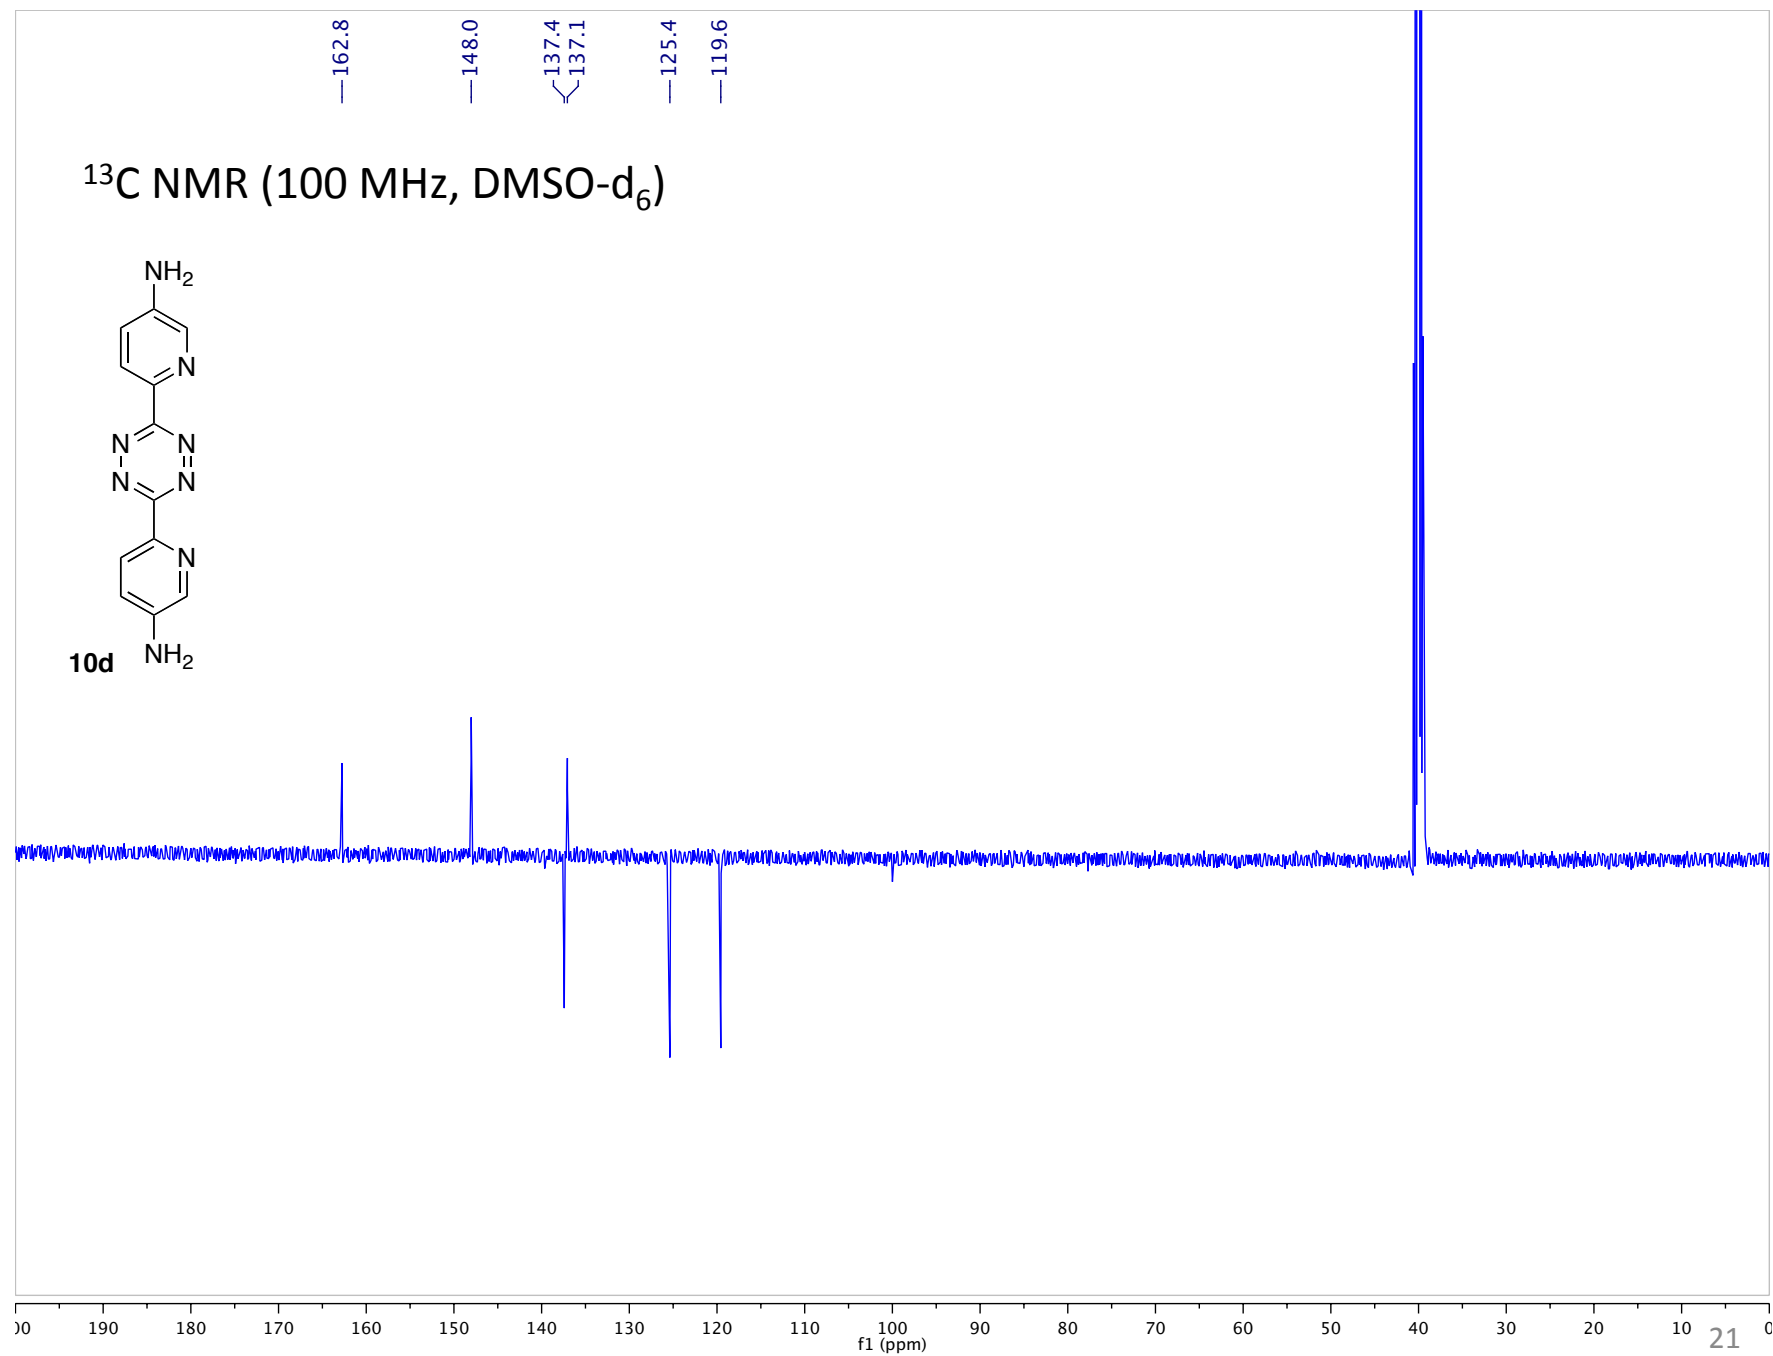

$^1\text{H}$  NMR (400 MHz,  $\text{CDCl}_3$ )

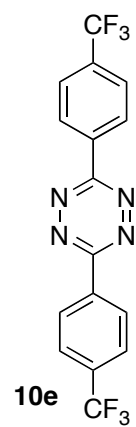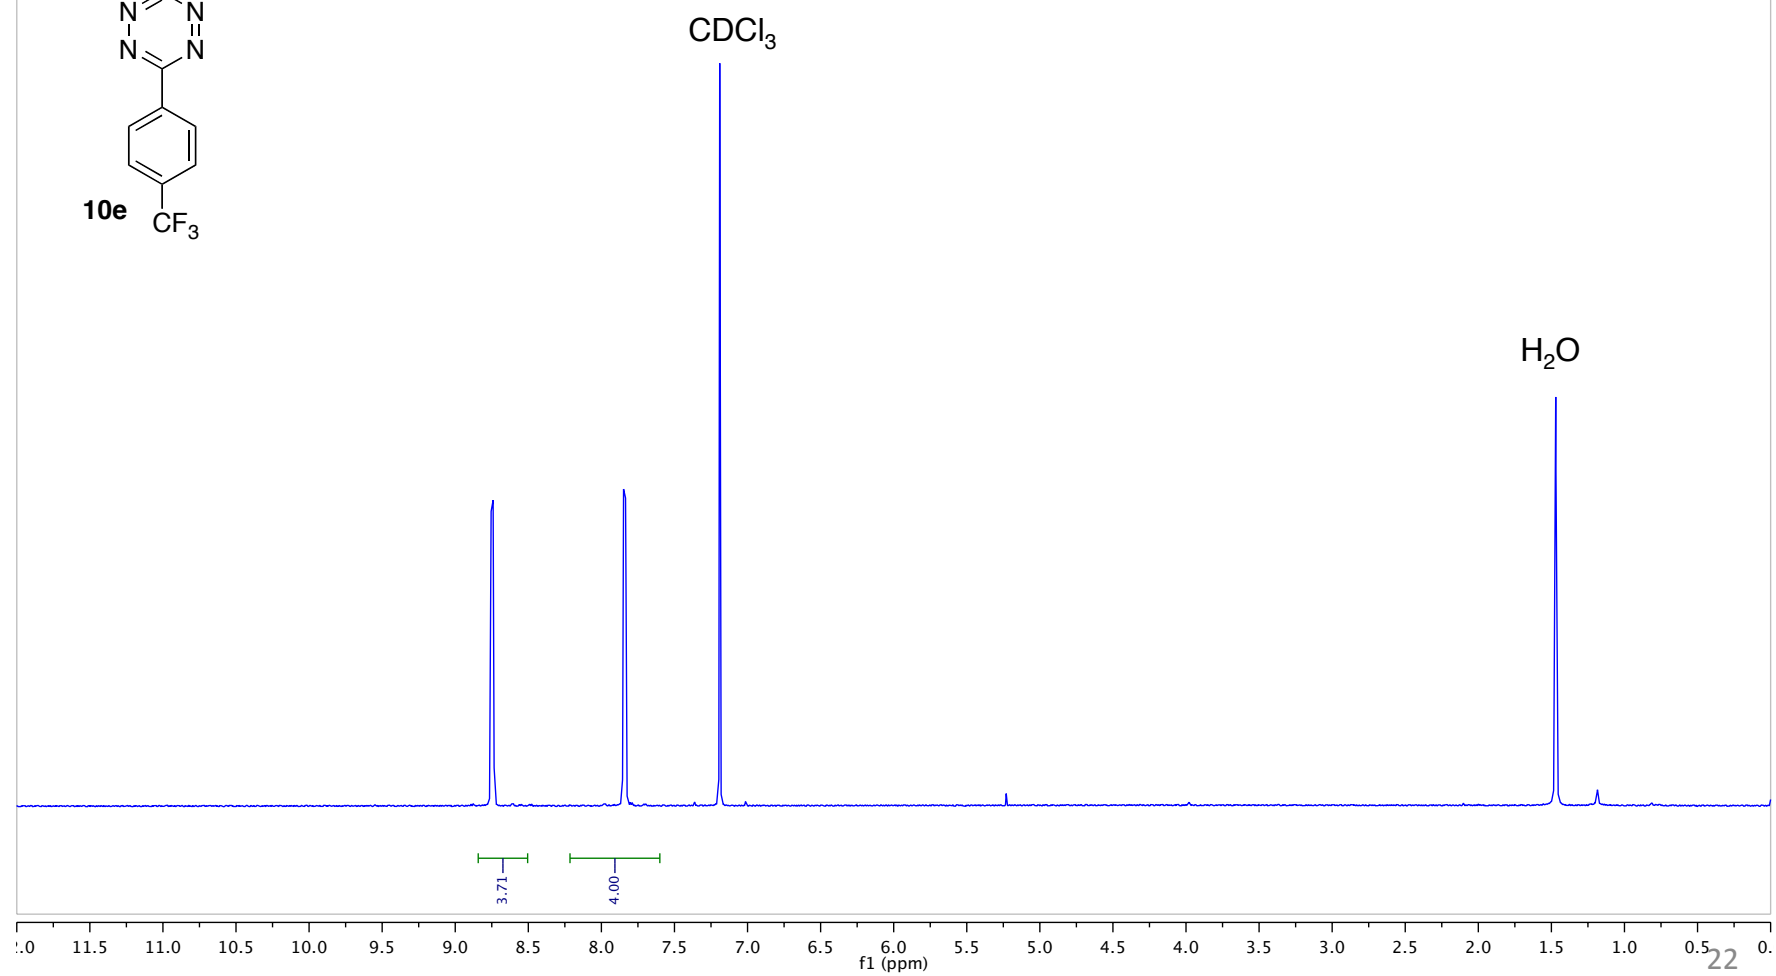

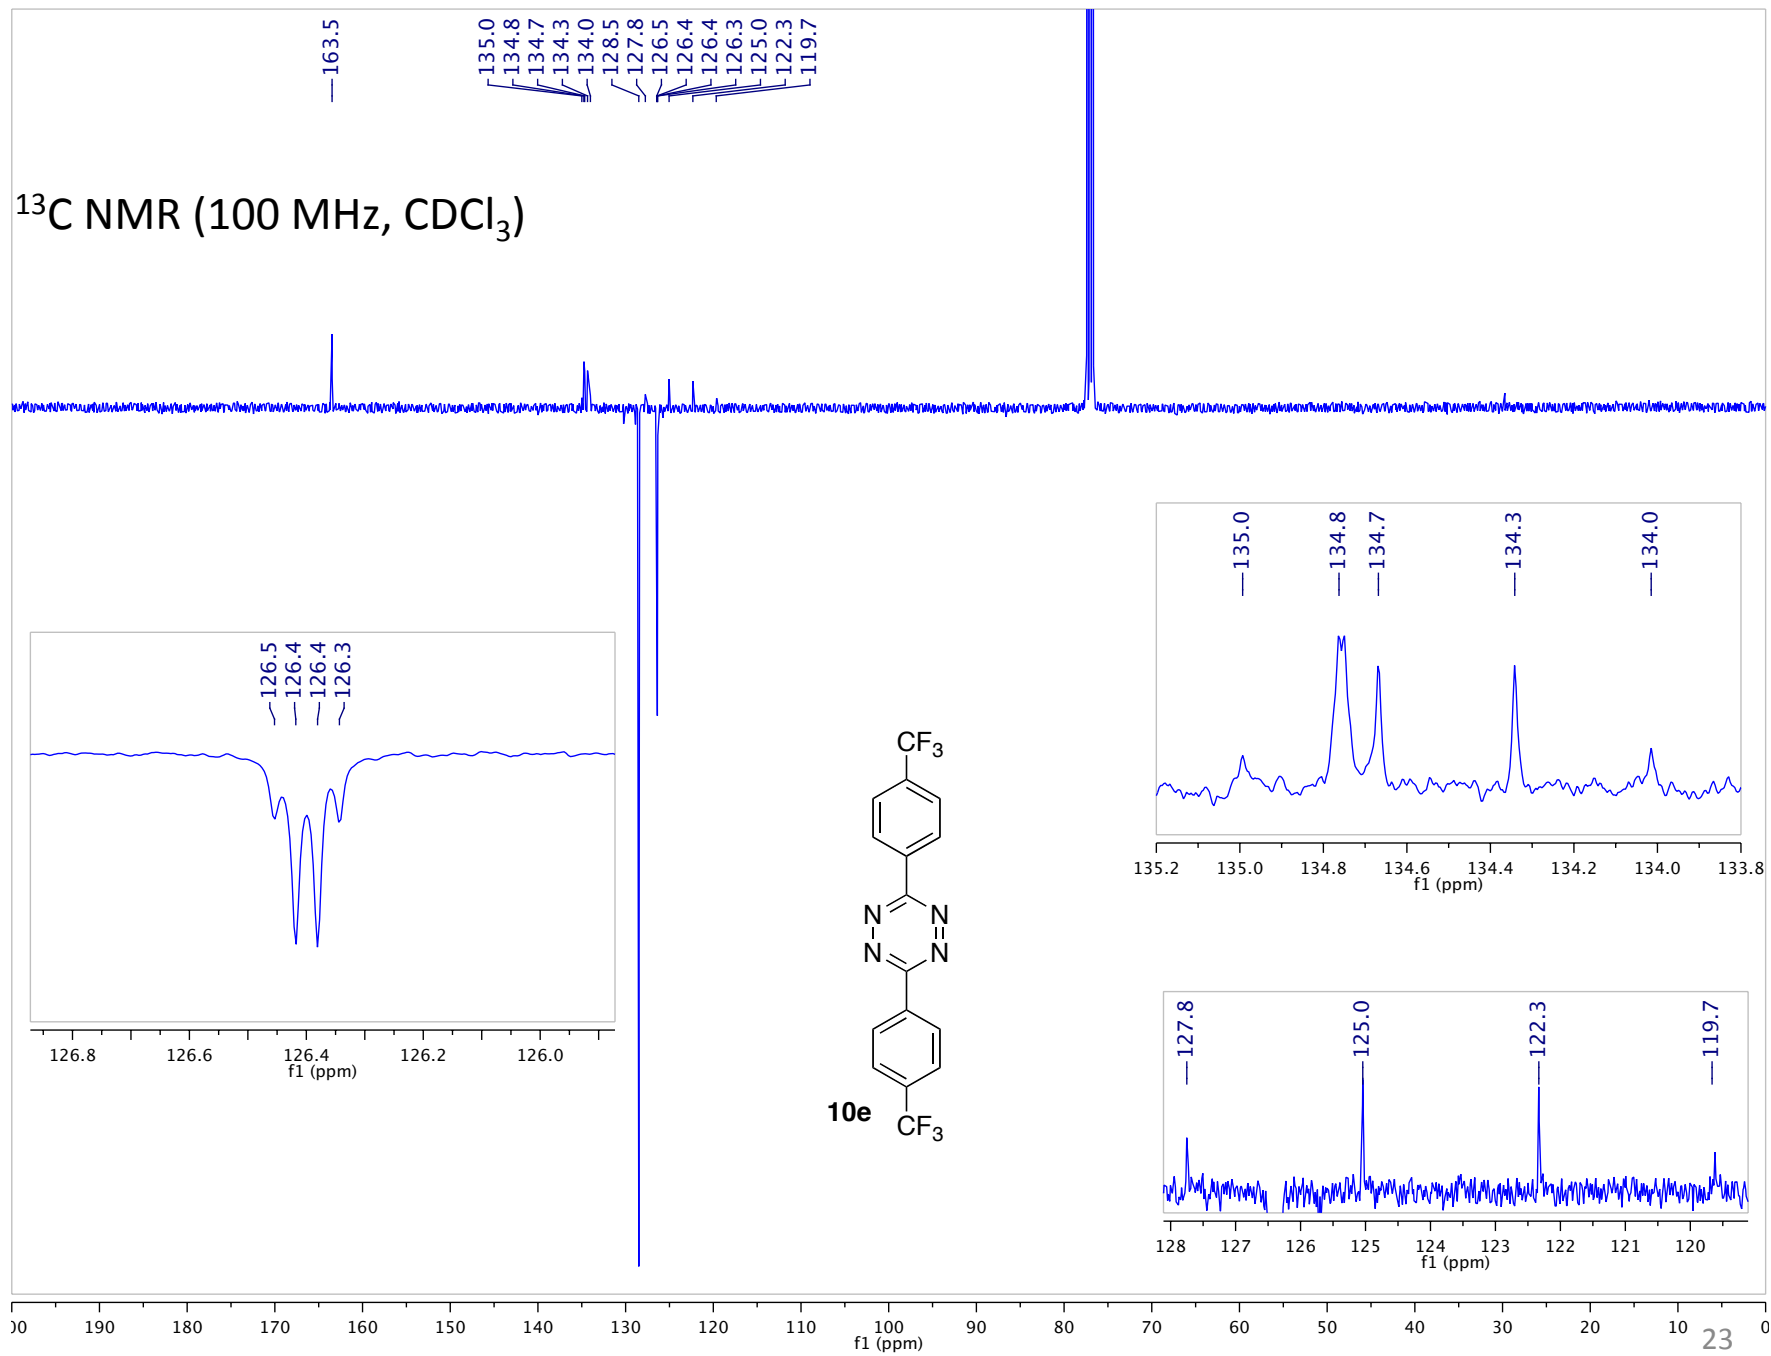

$^1\text{H}$  NMR (400 MHz,  $\text{CDCl}_3$ )

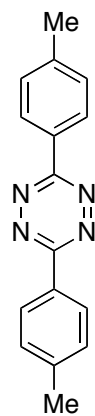

**10f**

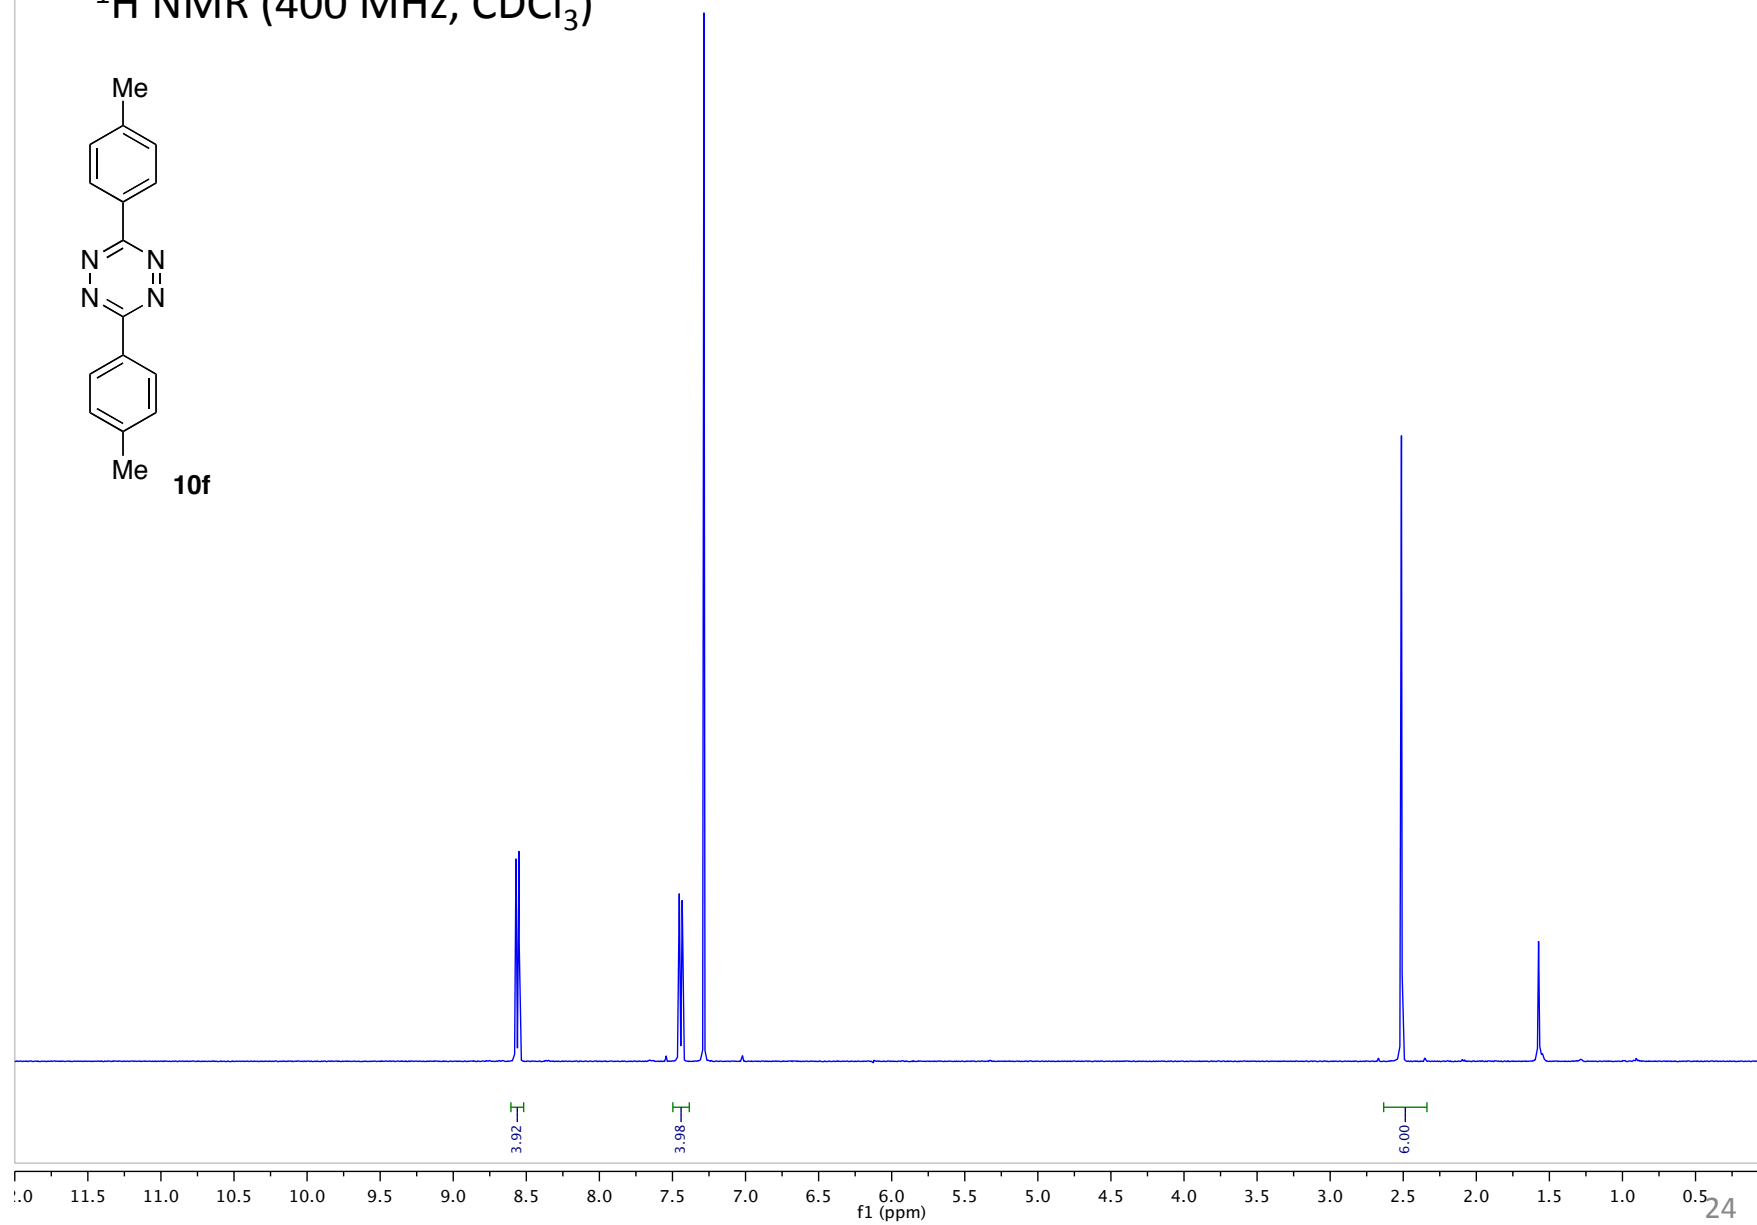

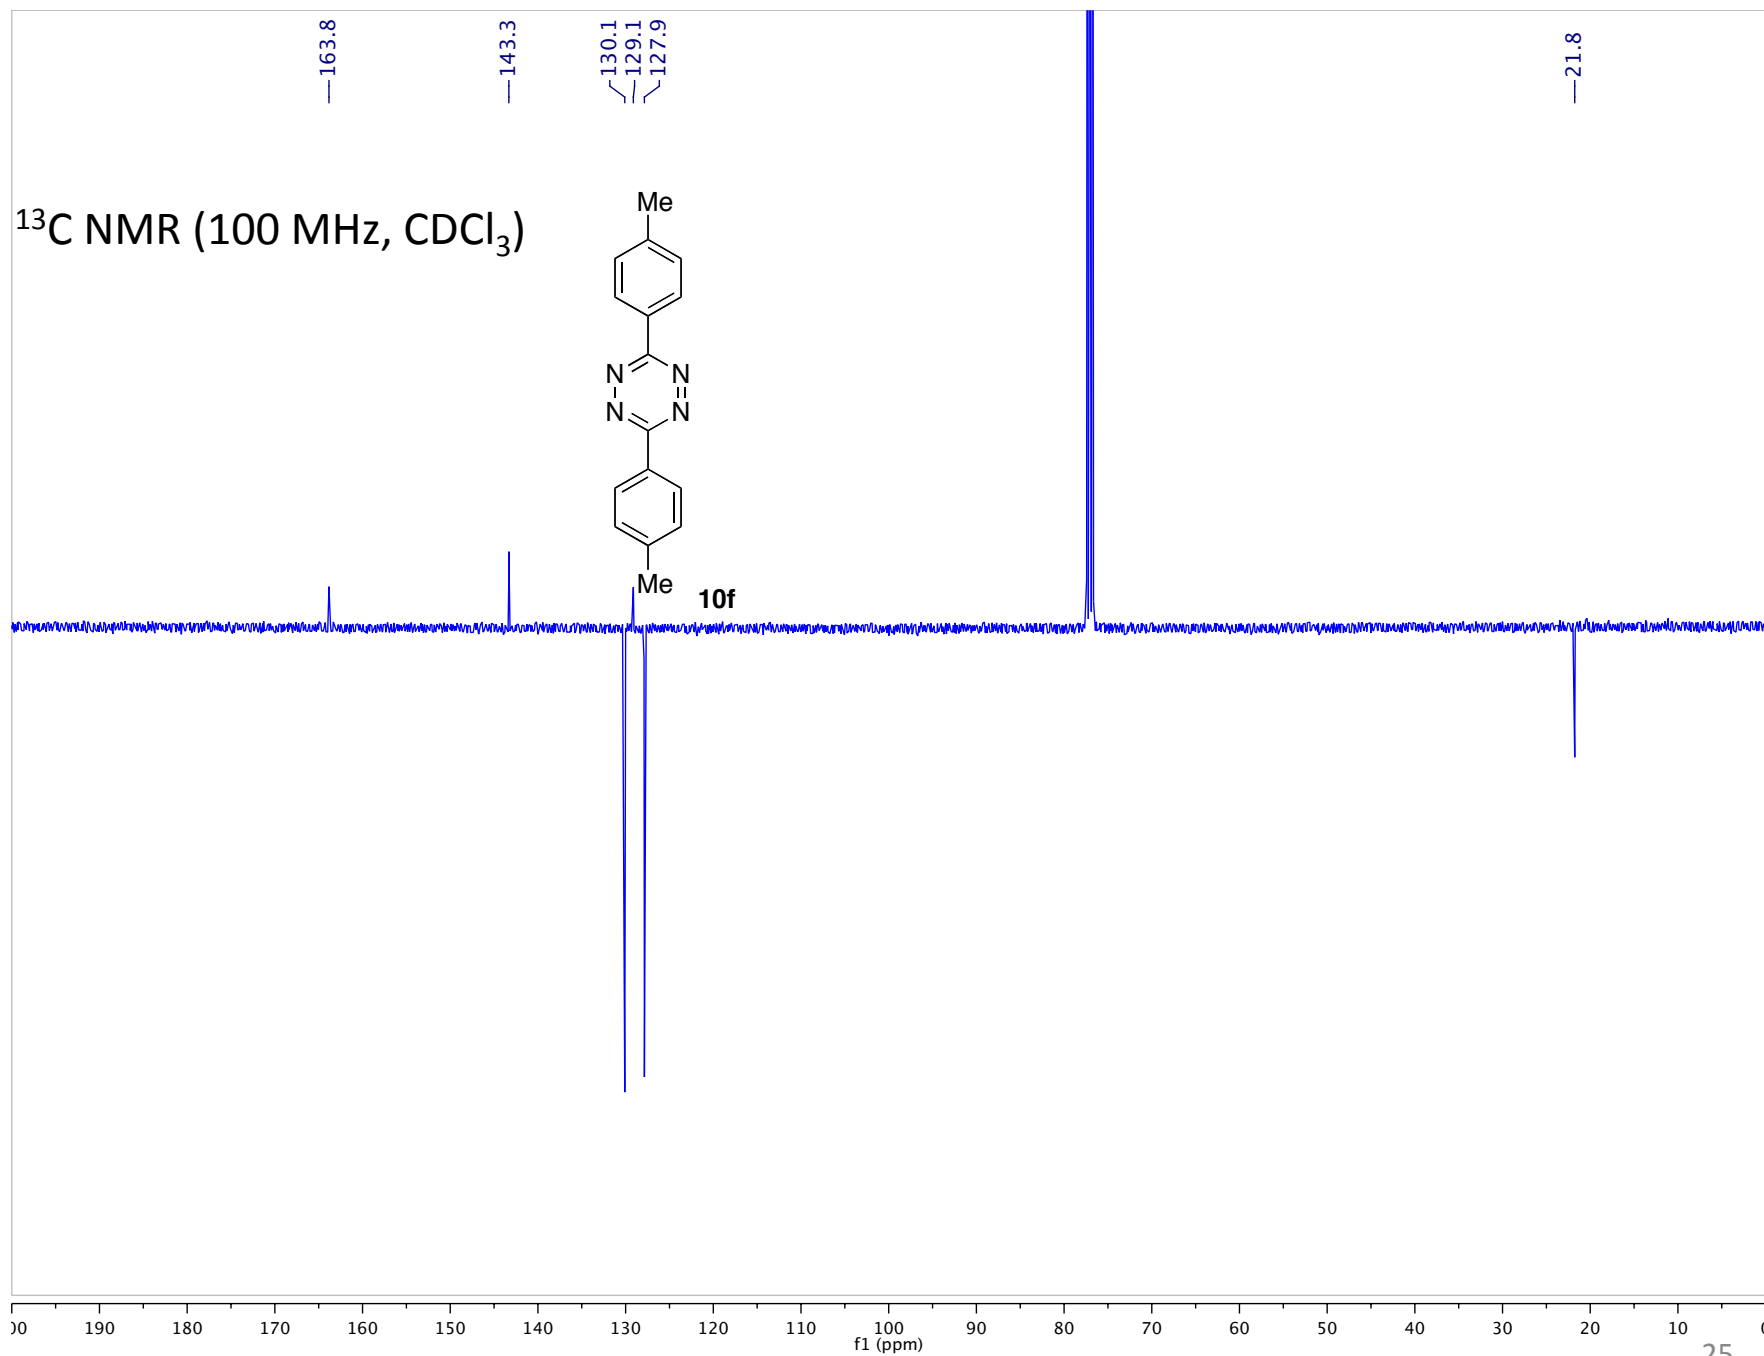

$^1\text{H}$  NMR (400 MHz,  $\text{CDCl}_3$ )

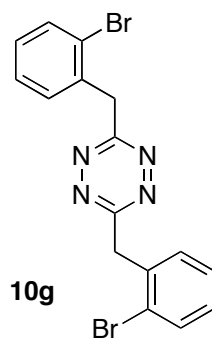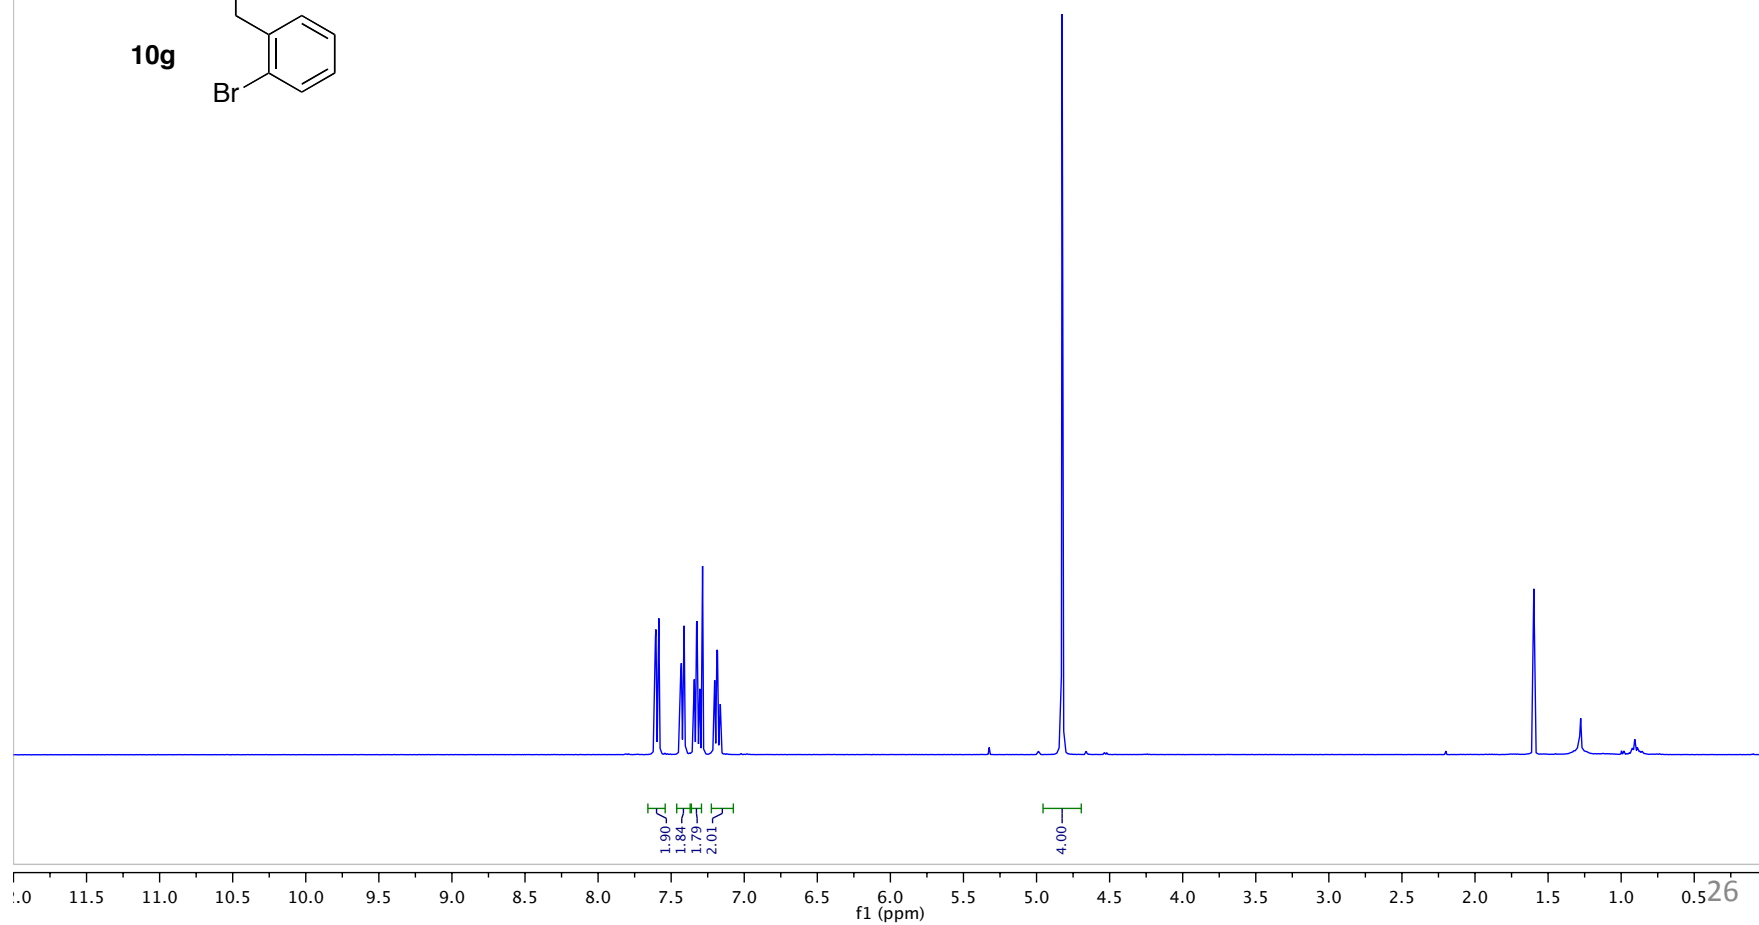

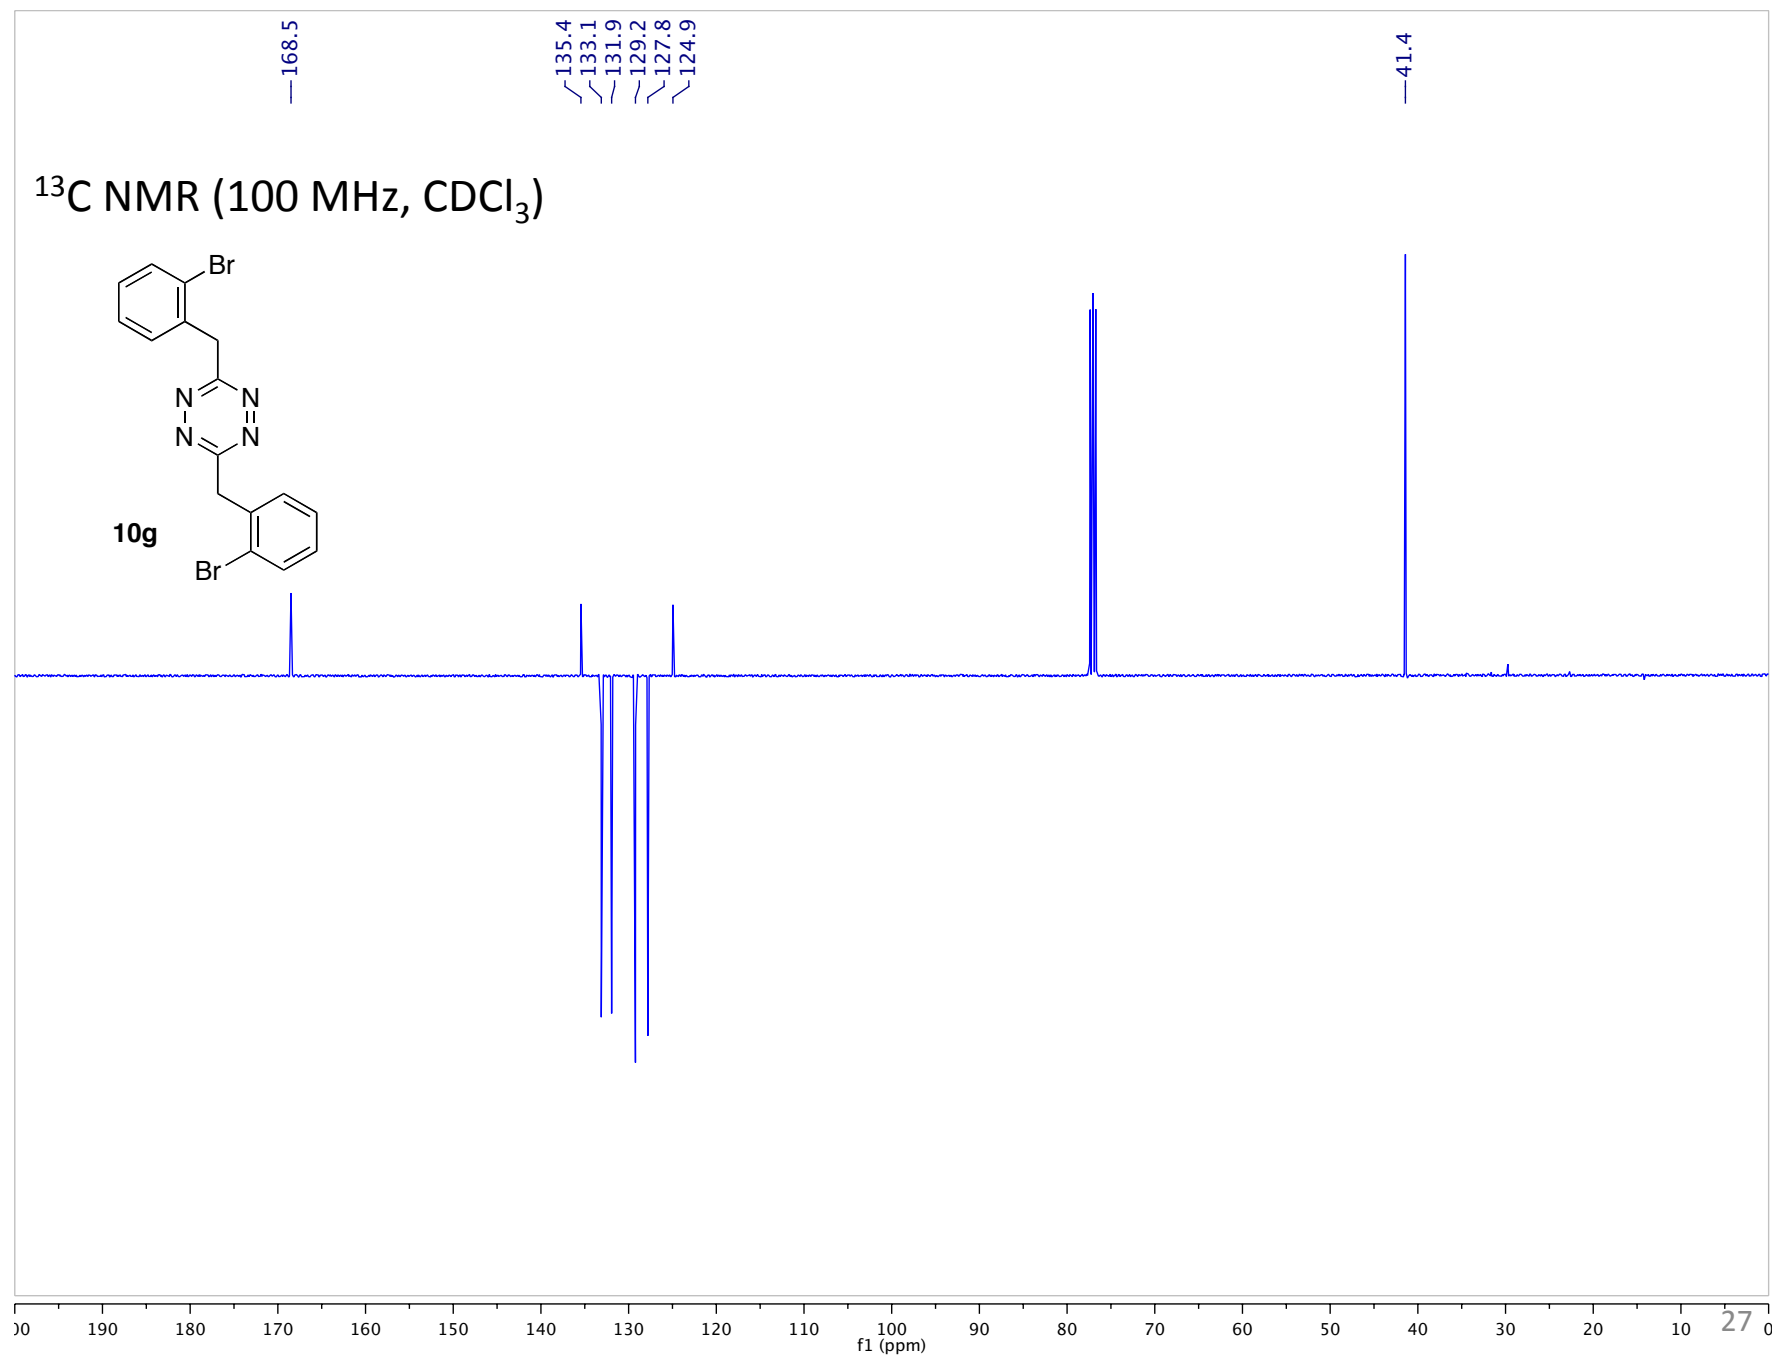

$^1\text{H}$  NMR (400 MHz,  $\text{CDCl}_3$ )

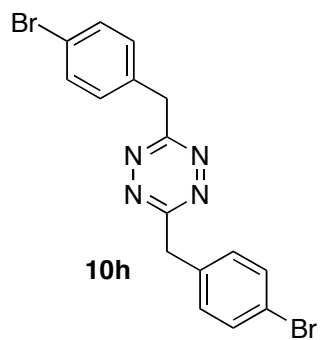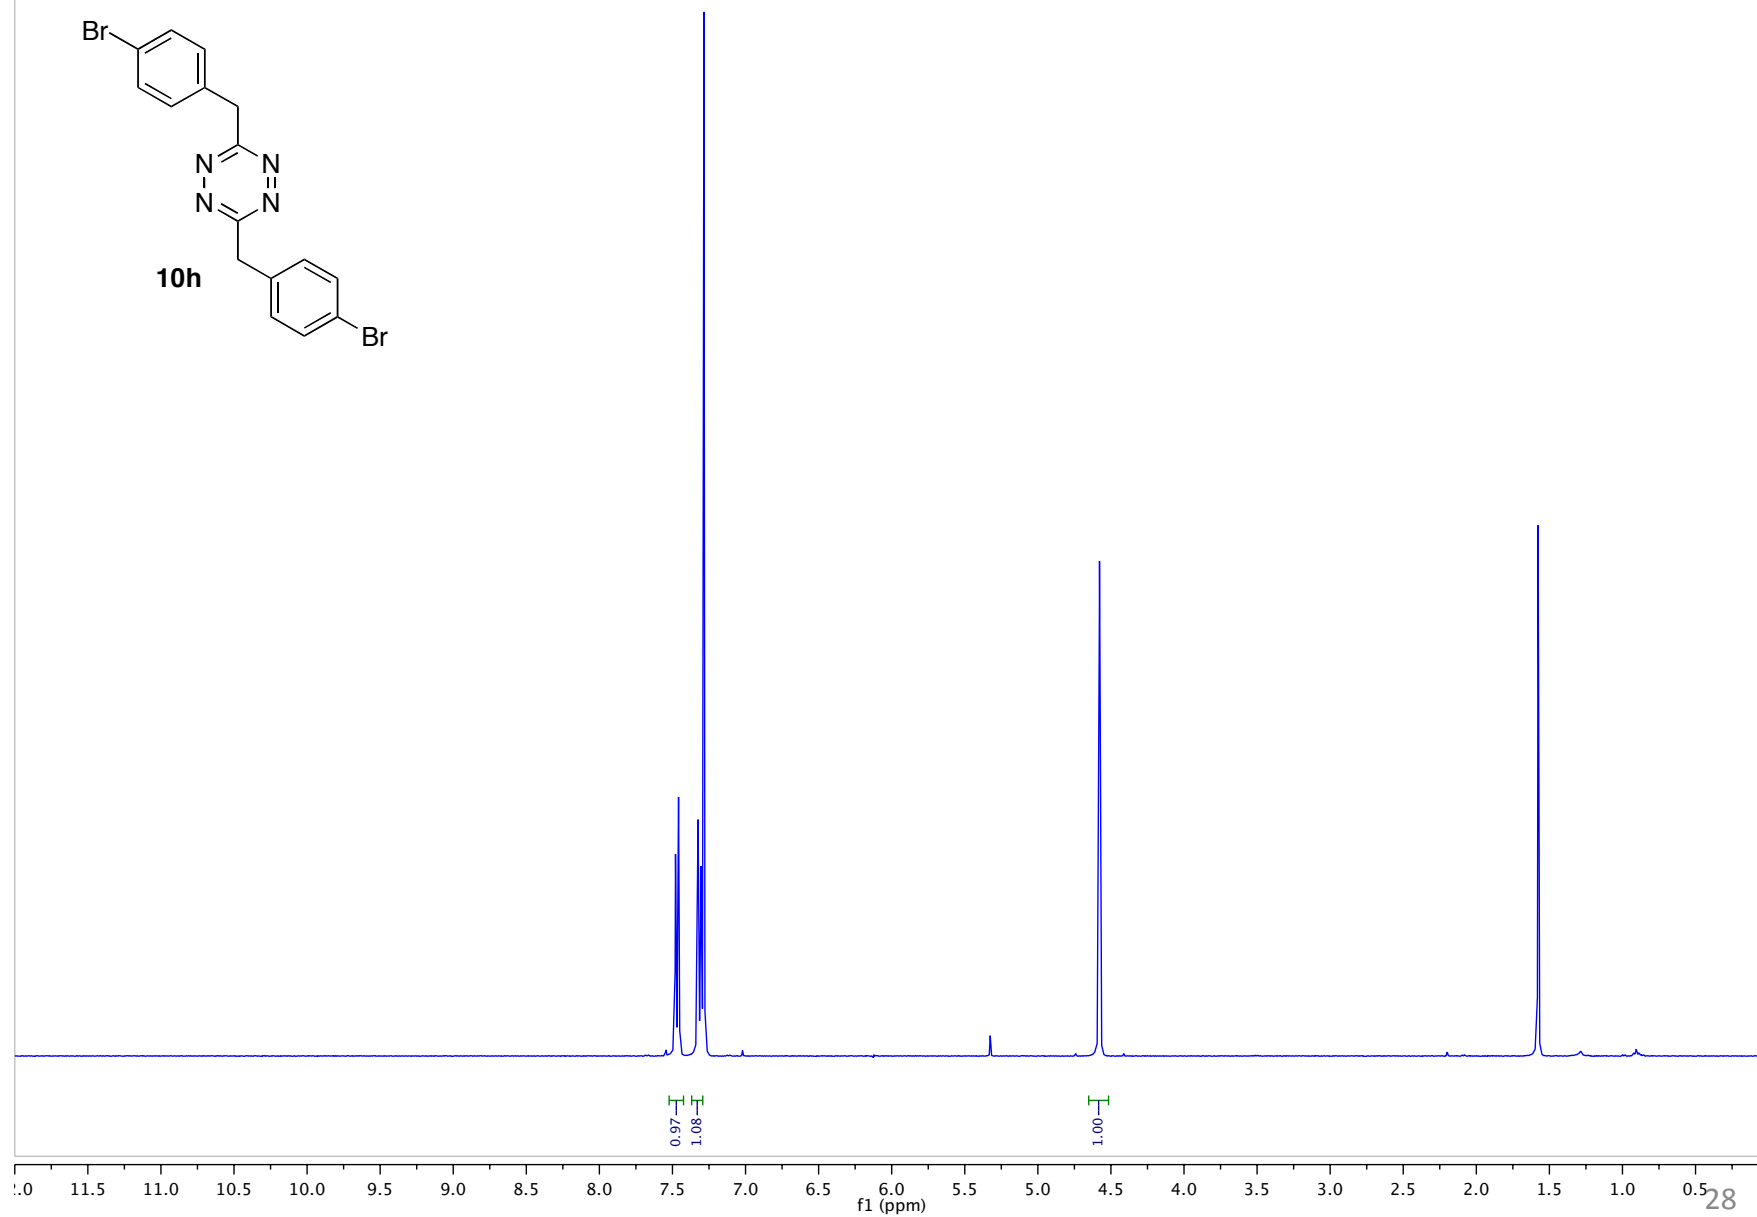

$^{13}\text{C}$  NMR (100 MHz,  $\text{CDCl}_3$ )

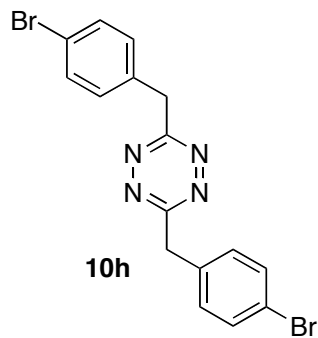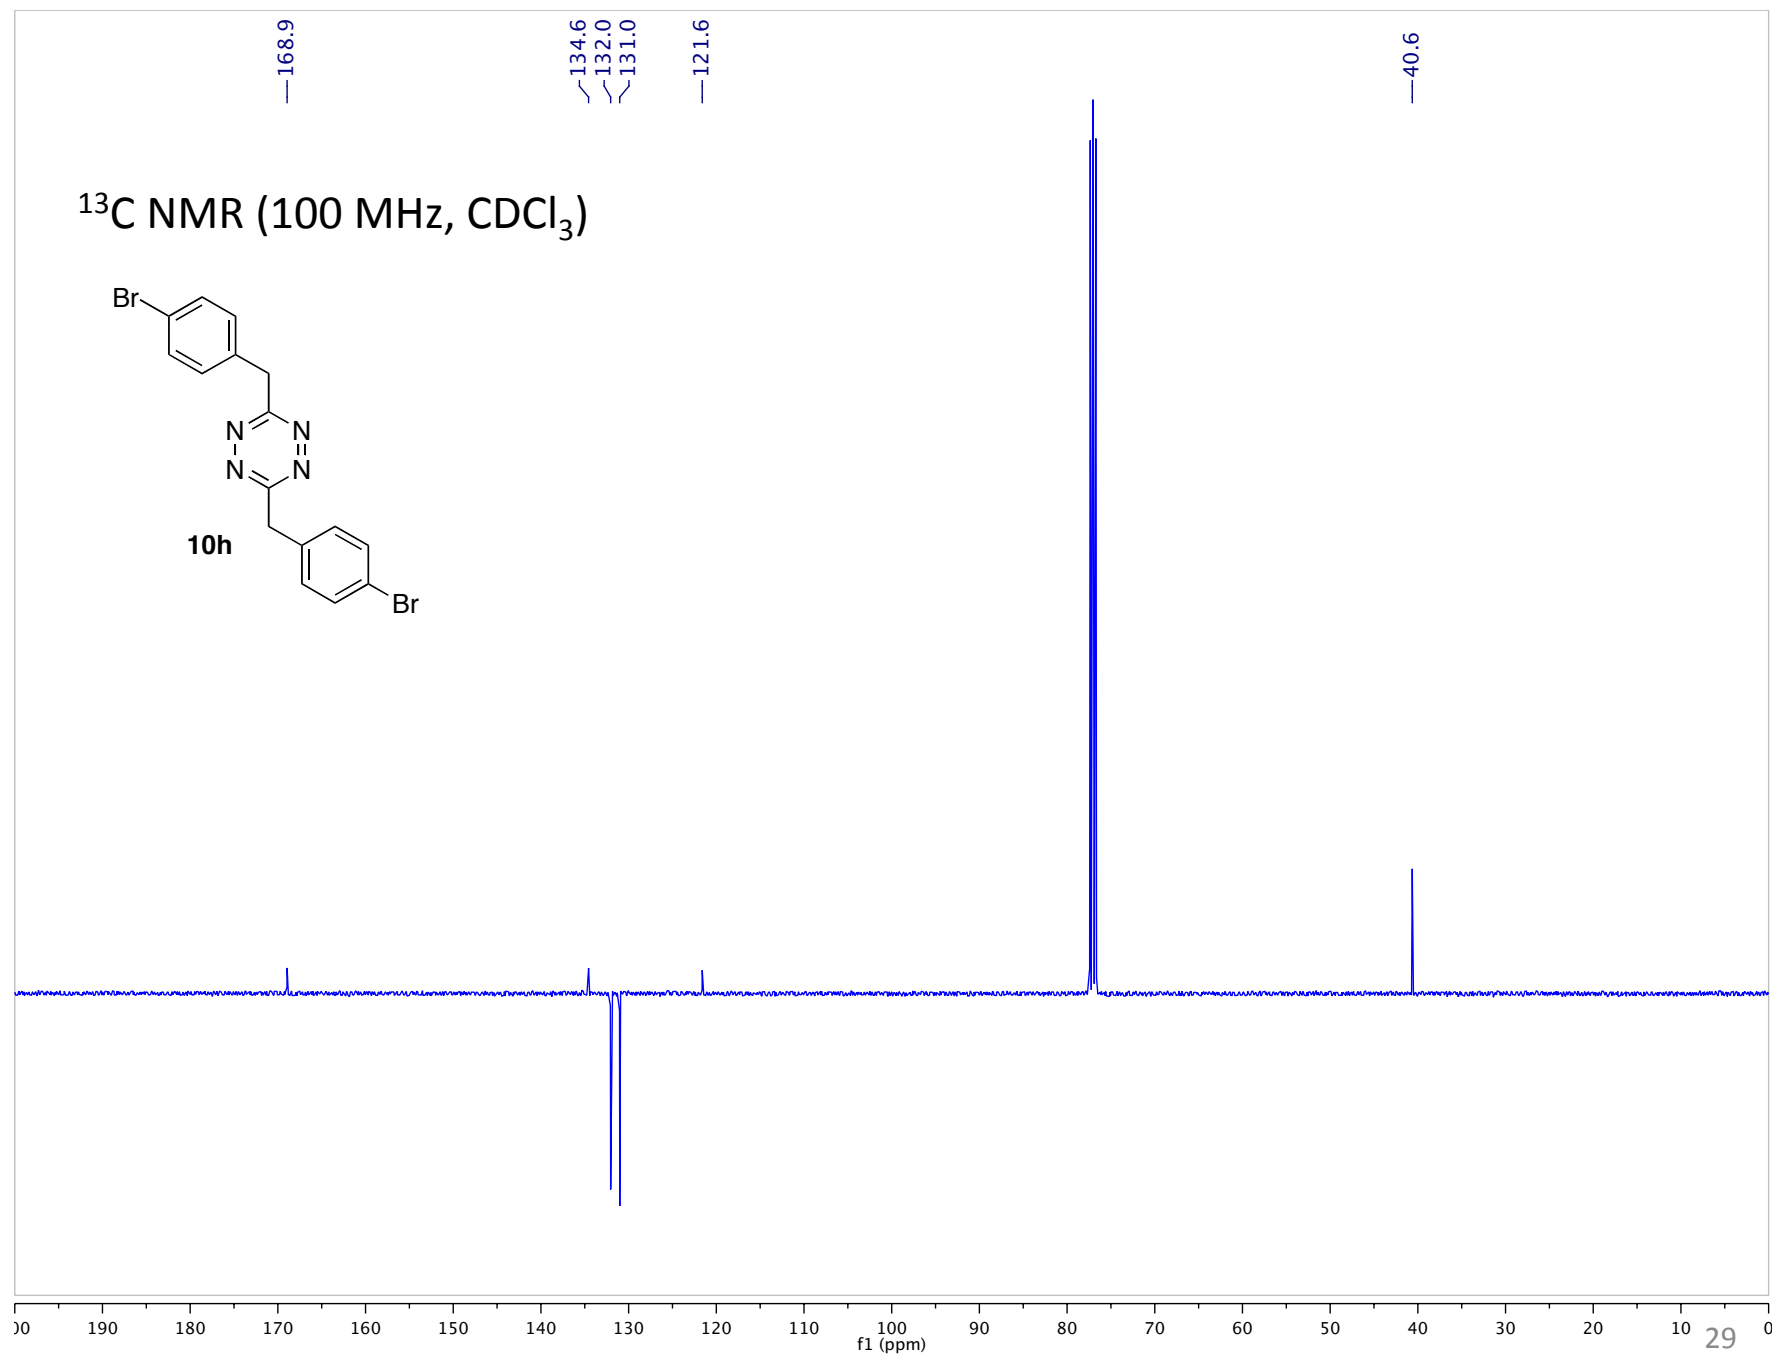

Supplement: NIHMS633471-supplement-Spectral_SI.pdf [file NIHMS633471-supplement-Spectral_SI.pdf]
